# Supplementary material
Source: MDPI journal article supplement (https://www.mdpi.com/2073-4344/9/5/461)
Supplement: s1 [file s1]

# Supplementary Materials: Development of Titanium Dioxide-Supported Pd Catalysts for Ligand-Free Suzuki–Miyaura Coupling of Aryl Chlorides

Tsuyoshi Yamada <sup>1</sup>, Hayato Masuda <sup>1</sup>, Kwihwan Park <sup>1</sup>, Takumu Tachikawa <sup>1</sup>, Naoya Ito <sup>1</sup>, Tomohiro Ichikawa <sup>1</sup>, Masatoshi Yoshimura <sup>2</sup>, Yukio Takagi <sup>2</sup>, Yoshinari Sawama <sup>1</sup>, Yutaka Ohya <sup>3</sup> and Hironao Sajiki <sup>1,\*</sup>

## Contents

### 1. General

### 2. Preparation of Pd/TiO<sub>2</sub> and Pd(red)/TiO<sub>2</sub>

### 3. XPS spectra of Pd/TiO<sub>2</sub>

### 4. Typical procedure for the coupling reaction between aryl chlorides and arylboronic acids

### 5. Optimization of 5% Pd/TiO<sub>2</sub> (anatase-type)-catalyzed Suzuki–Miyaura coupling reaction

### 6. Spectroscopic data of products

### 7. <sup>1</sup>H and <sup>13</sup>C NMR spectra of products

### 8. References

#### 1. General

All reagents and solvents were obtained from commercial sources and used without further purification. Pd(OAc)<sub>2</sub> was obtained from N.E. Chemcat Co. (Tokyo, Japan). The <sup>1</sup>H NMR and <sup>13</sup>C NMR spectra were recorded on a JEOL ECZ-400 (400 MHz for <sup>1</sup>H NMR and 100 MHz for <sup>13</sup>C NMR) spectrometer. CDCl<sub>3</sub> was used as the solvent for NMR measurement. Chemical shifts (δ) are expressed in part per million and internally referenced (0.00 ppm for tetramethylsilane or 7.26 ppm for CHCl<sub>3</sub> for <sup>1</sup>H NMR for CDCl<sub>3</sub> and 77.0 ppm for CDCl<sub>3</sub> for <sup>13</sup>C NMR). The JEOL JMS Q1000GC Mk II Quad GC/MS was used to determine the area ratio of aryl chlorides and coupling products. The ULVAC-PHI PHI QuanteraSXM was used for the X-ray photoelectron spectroscopy (XPS). All of <sup>1</sup>H and <sup>13</sup>C NMR spectra of known products were identical with those in the literature.

#### 2. Preparation of Pd/TiO<sub>2</sub> and Pd(red)/TiO<sub>2</sub>

**5% Pd/TiO<sub>2</sub> (Cat. D, anatase-type):** A suspension of anatase-type TiO<sub>2</sub> (3.00 g, colorless powder) in MeCN solution (30 mL) of Pd(OAc)<sub>2</sub> [316 mg, 1.41 mmol (150 mg, palladium quantity)] was stirred under argon atmosphere at 25 °C for 4 days. The resulting light yellow solid was collected by filtration (1 μm filter paper), washed with H<sub>2</sub>O (5 mL × 5) and EtOAc (5 mL × 5) and dried in vacuo for 24 h to afford the Pd/TiO<sub>2</sub> (3.15 g, Cat. D, anatase-type). The filtrate was concentrated in vacuo, and then transferred to a 100 mL volumetric flask with H<sub>2</sub>O and 15.58 ppm (1.56 mg) of palladium species were observed in the diluted filtrate by the use of atomic absorption spectrometry (SHIMADZU AA-7000). Since the total palladium species which was not absorbed on anatase-type TiO<sub>2</sub> was 1.56 mg, the palladium content of anatase-type Pd/TiO<sub>2</sub> (Cat. D) was approximately 5% (4.7%) [(150 - 1.56)/3150 × 100].

**5% Pd(red)/TiO<sub>2</sub> (Cat. A, anatase-type):** The collected anatase-type 5% Pd/TiO<sub>2</sub> (Cat. D, 500.0 mg) was stirred with NH<sub>2</sub>NH<sub>2</sub>·H<sub>2</sub>O (29.2 µL, 0.6 mmol) in H<sub>2</sub>O (40 mL) under argon atmosphere at 25 °C for 24 h. The grayish white solid was collected by filtration (1 µm filter paper), washed with H<sub>2</sub>O (10 mL × 5) and EtOAc (10 mL × 5), and dried in vacuo for 12 h to give Pd(red)/TiO<sub>2</sub> (343 mg, Cat. A, anatase-type).

**5% Pd(red)/TiO<sub>2</sub> (Cat. B, anatase-type):** The collected anatase-type 5% Pd/TiO<sub>2</sub> (Cat. D, 500.0 mg) was stirred with NaBH<sub>4</sub> (22.7 mg, 0.6 mmol) in H<sub>2</sub>O (40 mL) under argon atmosphere at 25 °C for 24 h. The grayish white solid was collected by filtration (1 µm filter paper), washed with H<sub>2</sub>O (10 mL × 5) and EtOAc (10 mL × 5), and dried in vacuo for 12 h to give Pd(red)/TiO<sub>2</sub> (442 mg, Cat. B, anatase-type).

**5% Pd(red)/TiO<sub>2</sub> (Cat. C, anatase-type):** The collected anatase-type 5% Pd/TiO<sub>2</sub> (Cat. D, 500.0 mg) was stirred in H<sub>2</sub>O (40 mL) under H<sub>2</sub> atmosphere at 25 °C for 24 h. The grayish white solid was collected by filtration (1 µm filter paper), washed with H<sub>2</sub>O (10 mL × 5) and EtOAc (10 mL × 5), and dried in vacuo for 12 h to give Pd(red)/TiO<sub>2</sub> (416 mg, Cat. C, anatase-type).

**4% Pd/TiO<sub>2</sub> (Cat. E, anatase-type):** A suspension of anatase-type TiO<sub>2</sub> (500 mg, colorless powder) in EtOAc solution (5 mL) of Pd(OAc)<sub>2</sub> [52.8 mg, 235 µmol (25 mg, palladium quantity)] was stirred under argon atmosphere at 25 °C for 4 days. The resulting light yellow solid was collected by filtration (1 µm filter paper), washed with H<sub>2</sub>O (5 mL × 5) and EtOAc (5 mL × 5), and dried in vacuo for 24 h to afford the Pd/TiO<sub>2</sub> (525 mg, Cat. E, anatase-type). The filtrate was concentrated in vacuo, and then transferred to a 100 mL volumetric flask with H<sub>2</sub>O and 24.235 ppm (2.42 mg) of palladium species were observed in the diluted filtrate by the use of atomic absorption spectrometry (SHIMADZU AA-7000). Since the total palladium species which was not absorbed on anatase-type TiO<sub>2</sub> was 2.42 mg, the palladium content of anatase-type Pd/TiO<sub>2</sub> (Cat. E) was approximately 4% (4.3%) [(25-2.42)/525×100].

**5% Pd/TiO<sub>2</sub> (Cat. F, rutile-type):** A suspension of rutile-type TiO<sub>2</sub> (500 mg, colorless powder) in MeCN solution (5 mL) of Pd(OAc)<sub>2</sub> [52.8 mg, 235 µmol (25 mg, palladium quantity)] was stirred under argon atmosphere at 25 °C for 4 days. The resulting light yellow solid was collected by filtration (1 µm filter paper), washed with H<sub>2</sub>O (5 mL × 5) and EtOAc (5 mL × 5), and dried in vacuo for 24 h to afford the Pd/TiO<sub>2</sub> (527 mg, Cat. F, rutile-type). The filtrate was concentrated in vacuo, and then transferred to a 200 mL volumetric flask with H<sub>2</sub>O and 6.650 ppm (1.33 mg) of palladium species were observed in the diluted filtrate by the use of atomic absorption spectrometry (SHIMADZU AA-7000). Since the total palladium species which was not absorbed on anatase-type TiO<sub>2</sub> was 1.56 mg, the palladium content of anatase-type Pd/TiO<sub>2</sub> (Cat. F) was approximately 5% (4.5%) [(25-1.33)/527×100].

**5% Pd/TiO<sub>2</sub> (Cat. G, rutile-type):** A suspension of rutile-type TiO<sub>2</sub> (500 mg, colorless powder) in EtOAc solution (5 mL) of Pd(OAc)<sub>2</sub> [52.8 mg, 235 µmol (25 mg, palladium quantity)] was stirred under argon atmosphere at 25 °C for 4 days. The resulting light yellow solid was collected by filtration (1 µm filter paper), washed with H<sub>2</sub>O (5 mL × 5) and EtOAc (5 mL × 5), and dried in vacuo for 24 h to afford the Pd/TiO<sub>2</sub> (510 mg, Cat. G, rutile-type). The filtrate was concentrated in vacuo, and then transferred to a 100 mL volumetric flask with H<sub>2</sub>O and 6.075 ppm (0.61 mg) of palladium species were observed in the diluted filtrate by the use of atomic absorption spectrometry (SHIMADZU AA-7000). Since the total palladium species which was not absorbed on anatase-type TiO<sub>2</sub> was 0.61 mg, the palladium content of anatase-type Pd/TiO<sub>2</sub> (Cat. G) was approximately 5% (4.8%) [(25-0.61)/510×100].

**5% Pd/TiO<sub>2</sub> (Cat. H, brookite-type):** A suspension of brookite-type TiO<sub>2</sub> (500 mg, colorless powder) in MeCN solution (5 mL) of Pd(OAc)<sub>2</sub> [52.8 mg, 235 µmol (25 mg, palladium quantity)] was stirred under argon atmosphere at 25 °C for 4 days. The resulting light yellow solid was collected by filtration (1 µm filter paper), washed with H<sub>2</sub>O (5 mL × 5) and EtOAc (5 mL × 5) and dried in vacuo for 24 h to afford the Pd/TiO<sub>2</sub> (509 mg, Cat. H, brookite-type). The filtrate was concentrated in vacuo, and then transferred to a 100 mL volumetric flask with H<sub>2</sub>O and 14.378 ppm (1.44 mg) of palladium species were observed in the diluted filtrate by the use of atomic absorption spectrometry (SHIMADZU AA-

7000). Since the total palladium species which was not absorbed on anatase-type  $\text{TiO}_2$  was 1.44 mg, the palladium content of anatase-type  $\text{Pd/TiO}_2$  (Cat. **H**) was approximately 5% (4.6%)  $[(25-1.44)/509 \times 100]$ .

**5%  $\text{Pd/TiO}_2$  (Cat. **I**, brookite-type):** A suspension of brookite-type  $\text{TiO}_2$  (500 mg, colorless powder) in EtOAc solution (5 mL) of  $\text{Pd(OAc)}_2$  [52.8 mg, 235  $\mu\text{mol}$  (25 mg, palladium quantity)] was stirred under argon atmosphere at 25 °C for 4 days. The resulting light yellow solid was collected by filtration (1  $\mu\text{m}$  filter paper), washed with  $\text{H}_2\text{O}$  (5 mL  $\times$  5) and EtOAc (5 mL  $\times$  5) and dried in vacuo for 24 h to afford the  $\text{Pd/TiO}_2$  (471 mg, Cat. **I**, brookite-type). The filtrate was concentrated in vacuo, and then transferred to a 100 mL volumetric flask with  $\text{H}_2\text{O}$  and 12.235 ppm (1.22 mg) of palladium species observed in the diluted filtrate by the use of atomic absorption spectrometry (SHIMADZU AA-7000). Since the total palladium species which was not absorbed on anatase-type  $\text{TiO}_2$  was 1.22 mg, the palladium content of anatase-type  $\text{Pd/TiO}_2$  (Cat. **I**) was approximately 5% (5.0%)  $[(25-1.22)/471 \times 100]$ .

### 3. XPS Spectra of $\text{Pd/TiO}_2$

Area% of Pd(II) and Pd(0) species of the  $\text{Pd/TiO}_2$  (Cat. **E–I**) (Figure S1)

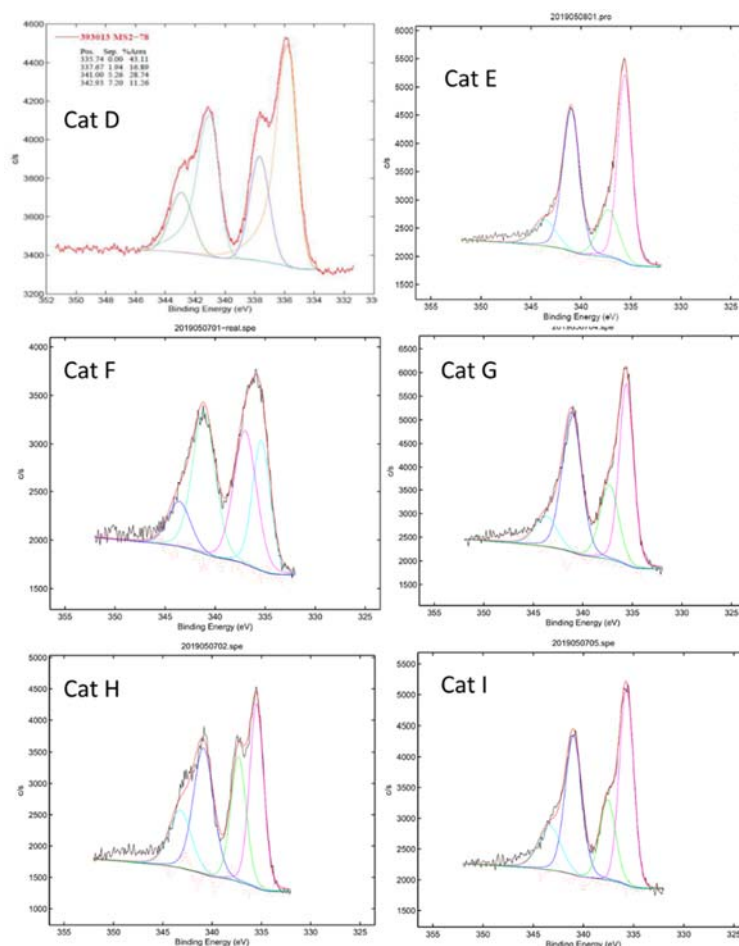

**Figure S1.** XPS image and curve-fitting of Pd peaks (Cat. **D–I**).

Characteristic peaks and detailed area% of Pd(0) species and Pd(II) ions of  $\text{Pd/TiO}_2$  (Cat. **D–I**).

| Position (eV)          | 342.9      | 341.0     | 337.7      | 335.7     |
|------------------------|------------|-----------|------------|-----------|
| Species                | Pd(II) 3d3 | Pd(0) 3d3 | Pd(II) 3d5 | Pd(0) 3d5 |
| Area% (Cat. <b>D</b> ) | 11.26      | 28.74     | 16.89      | 43.11     |
| Area% (Cat. <b>E</b> ) | 8.82       | 36.14     | 14.81      | 40.23     |

|                |       |       |       |       |
|----------------|-------|-------|-------|-------|
| Area% (Cat. F) | 10.60 | 33.79 | 31.58 | 24.04 |
| Area% (Cat. G) | 9.20  | 36.80 | 18.68 | 35.33 |
| Area% (Cat. H) | 15.47 | 30.48 | 22.93 | 31.12 |
| Area% (Cat. I) | 13.85 | 32.11 | 17.71 | 36.32 |

Area% of Pd(II) and Pd(0) species of 5% Pd/TiO<sub>2</sub> (Cat. D, anatase-type) before and after use (Figure S2).

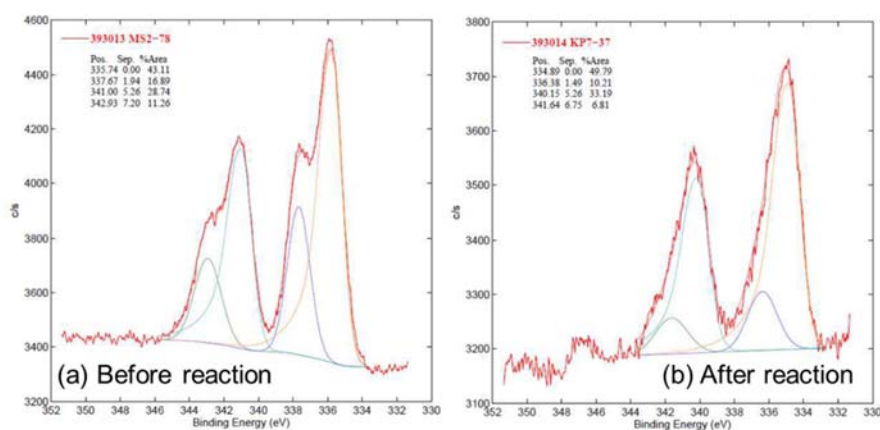

**Figure S2.** XPS image and curve-fitting of the Pd peaks of 5% Pd/TiO<sub>2</sub> (Cat. D, anatase-type) before and after use.

(a) Before reaction

|               |            |           |            |           |
|---------------|------------|-----------|------------|-----------|
| Position (eV) | 342.9      | 341.0     | 337.7      | 335.7     |
| Species       | Pd(II) 3d3 | Pd(0) 3d3 | Pd(II) 3d5 | Pd(0) 3d5 |
| Area%         | 11.26      | 28.74     | 16.89      | 43.11     |

(b) After reaction

|               |            |           |            |           |
|---------------|------------|-----------|------------|-----------|
| Position (eV) | 341.6      | 340.2     | 336.4      | 334.9     |
| Species       | Pd(II) 3d3 | Pd(0) 3d3 | Pd(II) 3d5 | Pd(0) 3d5 |
| Area%         | 6.81       | 33.19     | 10.21      | 47.79     |

#### 4. Typical procedure for the coupling reaction between aryl chlorides and arylboronic acids

A mixture of 5% Pd/TiO<sub>2</sub> (30.0 mg, 12.5  $\mu$ mol), an aryl chloride (250  $\mu$ mol), an arylboronic acid (375  $\mu$ mol), Cs<sub>2</sub>CO<sub>3</sub> (163 mg, 500  $\mu$ mol) in DMA (1 mL) was stirred at 80 °C in a test tube tightly sealed under argon. After 24 h, the mixture was cooled to 25 °C, diluted with EtOAc (10 mL) and H<sub>2</sub>O (10 mL), and filtered through a membrane filter (pore size: 0.2  $\mu$ m). The catalyst on the filter was washed with EtOAc (10 mL) and H<sub>2</sub>O (10 mL), and combined filtrates were separated to two layers. The aqueous layer was extracted with EtOAc (15 mL  $\times$  3), and combined EtOAc layers were washed with H<sub>2</sub>O (20 mL  $\times$  3) and brine (20 mL), dried over Na<sub>2</sub>SO<sub>4</sub>, filtered, and concentrated in vacuo. The residue was purified by silica-gel column chromatography using hexane/EtOAc as eluents to afford the corresponding biaryl derivative.

#### 5. Optimization of 5% Pd/TiO<sub>2</sub> (anatase-type)-catalyzed Suzuki–Miyaura coupling reaction

**Table S1.** Base efficiency.

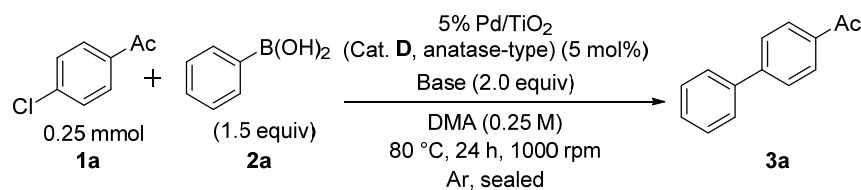

| Entry | Base                                                 | Ratio of <b>1a</b> and <b>3a</b> <sup>a</sup> |
|-------|------------------------------------------------------|-----------------------------------------------|
| 1     | Cs <sub>2</sub> CO <sub>3</sub>                      | 0:100 (99) <sup>b</sup>                       |
| 2     | Na <sub>2</sub> CO <sub>3</sub>                      | 18:82                                         |
| 3     | K <sub>2</sub> CO <sub>3</sub>                       | 33:73                                         |
| 4     | NaHCO <sub>3</sub>                                   | 22:78                                         |
| 5     | NaOtBu                                               | 27:73                                         |
| 6     | KOtBu                                                | 0:100 (75) <sup>b</sup>                       |
| 7     | Na <sub>3</sub> PO <sub>4</sub> · 12H <sub>2</sub> O | 6:94                                          |
| 8     | K <sub>3</sub> PO <sub>4</sub>                       | 22:78                                         |

<sup>a</sup> Ratios were determined by <sup>1</sup>H NMR using 1,1,2,2-tetrachloroethane as an internal standard. <sup>b</sup> Isolated yield is indicated in parenthesis.

**Table S2.** Solvent efficiency.

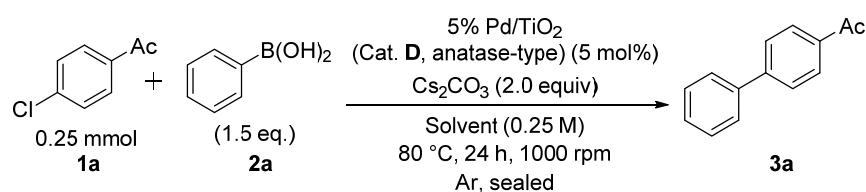

| Entry | Solvent            | Ratio of <b>1a</b> and <b>3a</b> <sup>a</sup> |
|-------|--------------------|-----------------------------------------------|
| 1     | <b>DMA</b>         | <b>0:100 (99) <sup>b</sup></b>                |
| 2     | DMF                | 27:73                                         |
| 3     | 1,4-Dioxane        | 93:7                                          |
| 4     | CPME               | 90:10                                         |
| 5     | Toluene            | 90:10                                         |
| 7     | H <sub>2</sub> O   | 94:6                                          |
| 6     | CH <sub>3</sub> OH | 85:15                                         |
| 8     | 2-PrOH             | 59:41                                         |
| 9     | 50% 2-PrOH         | 89:11                                         |
| 10    | 50% DMA            | 33:67                                         |
| 11    | DMA                | 100:0 <sup>c</sup>                            |

<sup>a</sup> Ratios were determined by <sup>1</sup>H NMR using 1,1,2,2-tetrachloroethane as an internal standard. <sup>b</sup> Isolated yield is indicated in parenthesis. <sup>c</sup> At 25 °C.

**Table S3.** Time course study.

|             |                                               |
|-------------|-----------------------------------------------|
|             |                                               |
| Time        | Ratio of <b>1a</b> and <b>3a</b> <sup>a</sup> |
| 6 h         | 62:38                                         |
| 12 h        | 39:61                                         |
| 20 h        | 2:98                                          |
| <b>24 h</b> | <b>0:100 (99)</b> <sup>b</sup>                |

<sup>a</sup> Ratios were determined by <sup>1</sup>H NMR using 1,1,2,2-tetrachloroethane as an internal standard. <sup>b</sup> Isolated yield is indicated in parenthesis.

## 6. Spectroscopic Data of Products

### 4-Acetylbiphenyl (**3a**) [CAS Reg. No. 92-91-1]<sup>1</sup>

Obtained in 99% yield (48.6 mg, 248 μmol) from 4'-chloroacetophenone (38.6 mg, 250 μmol) and phenylboronic acid (45.7 mg, 375 μmol).

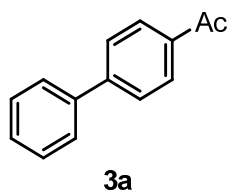

<sup>1</sup>H NMR [400 MHz (ECZ-400, CDCl<sub>3</sub>)] δ 8.04 (2H d, *J* = 8.0 Hz), 7.69 (2H, d, *J* = 8.0 Hz), 7.63 (2H, d, *J* = 7.6 Hz), 7.48 (2H, t, *J* = 6.8 Hz), 7.41 (1H t, *J* = 6.8 Hz), 2.65 (3H, s); <sup>13</sup>C NMR (100 MHz, CDCl<sub>3</sub>) δ 197.7, 145.7, 139.8, 135.7, 128.9, 128.8, 128.2, 127.2, 127.1, 26.6.

### 3-Acetylbiphenyl (**3b**) [CAS Reg. No. 3112-01-4]<sup>1</sup>

Obtained in 68% yield (33.4 mg, 170 μmol) from 3'-chloroacetophenone (38.6 mg, 250 μmol), phenylboronic acid (61.0 mg, 500 μmol) using 5% Pd/TiO<sub>2</sub> (60mg, 25.0 μmol, Cat. **D**, anatase-type) and Cs<sub>2</sub>CO<sub>3</sub> (244.5 mg, 500 μmol).

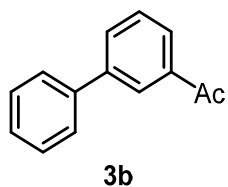

<sup>1</sup>H NMR [400 MHz (ECZ-400, CDCl<sub>3</sub>)] δ 8.18 (1H, s), 7.94 (1H, dt, *J* = 1.4 Hz, 8.0 Hz), 7.79 (1H, dt, *J* = 1.6 Hz, *J* = 8.0 Hz), 7.62 (2H, d, *J* = 7.2 Hz), 7.54 (1H, t, *J* = 7.8 Hz), 7.47 (2H, t, *J* = 7.4 Hz), 7.40 (1H, d, *J* = 7.2 Hz), 2.66 (3H, s); <sup>13</sup>C NMR [100 MHz (ECZ-400, CDCl<sub>3</sub>)] δ 198.1, 141.7, 140.2, 137.6, 131.7, 129.0, 128.9, 127.8, 127.2, 126.9 (2C), 26.8.

### 2-Acetylbiphenyl (**3c**) [CAS Reg. No. 2142-66-7]<sup>1</sup>

Obtained in 85% yield (41.9 mg, 213 μmol) from 2'-chloroacetophenone (38.6 mg, 250 μmol), phenylboronic acid (61.0 mg, 500 μmol) using 5% Pd/TiO<sub>2</sub> (60mg, 25.0 μmol, Cat. **D**, anatase-type), and Cs<sub>2</sub>CO<sub>3</sub> (244.5 mg, 500 μmol).

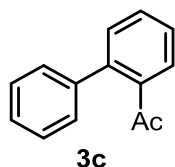

$^1\text{H}$  NMR [400 MHz (ECZ-400,  $\text{CDCl}_3$ )]  $\delta$  7.56–7.49 (2H, m), 7.44–7.34 (7H, m), 2.00 (3H, s);  $^{13}\text{C}$  NMR [100 MHz (ECZ-400,  $\text{CDCl}_3$ )]  $\delta$  204.9, 140.8, 140.6, 140.4, 130.7, 130.2, 128.8, 128.6, 127.8, 127.8, 127.4, 30.4.

**Ethyl biphenyl-4-carboxylate (3d) [CAS Reg. No. 6301-56-0]<sup>1</sup>**

Obtained in 76% yield (43.2 mg, 191  $\mu\text{mol}$ ) from ethyl 4-chlorobenzoate (46.2 mg, 250  $\mu\text{mol}$ ) and phenylboronic acid (45.7 mg, 375  $\mu\text{mol}$ ).

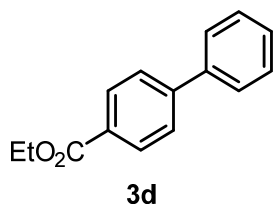

$^1\text{H}$  NMR [400 MHz (ECZ-400,  $\text{CDCl}_3$ )]  $\delta$  8.11 (2H, d,  $J$  = 8.0 Hz), 7.67–7.61 (4H, m), 7.47 (2H, t,  $J$  = 7.4 Hz), 7.39 (1H, t,  $J$  = 7.2 Hz), 4.40 (2H, q,  $J$  = 7.1 Hz), 1.41 (3H, t,  $J$  = 7.1 Hz);  $^{13}\text{C}$  NMR [100 MHz (ECZ-400,  $\text{CDCl}_3$ )]  $\delta$  166.4, 145.4, 140.0, 130.0, 129.1, 128.8, 128.0, 127.2, 126.9, 60.9, 14.3.

**Ethyl 4'-acetyl-[1,1'-biphenyl]-4-carboxylate(3e) [CAS Reg. No. 119838-61-8]<sup>1</sup>**

Obtained in 84% yield (56.6 mg, 211  $\mu\text{mol}$ ) from ethyl 4'-chlorobenzoate (46.2 mg, 250  $\mu\text{mol}$ ) and 4-acetylphenylboronic acid (61.5 mg, 375  $\mu\text{mol}$ ).

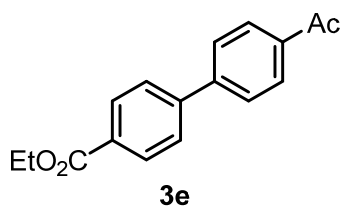

$^1\text{H}$  NMR [400 MHz (ECZ-400,  $\text{CDCl}_3$ )]  $\delta$  8.14 (2H, d,  $J$  = 8.2 Hz), 8.05 (2H, d,  $J$  = 8.2 Hz), 7.73–7.68 (4H, m), 4.41 (2H, q,  $J$  = 6.8 Hz), 2.65 (3H, s), 1.42 (3H, t,  $J$  = 6.8 Hz);  $^{13}\text{C}$  NMR [100 MHz (ECZ-400,  $\text{CDCl}_3$ )]  $\delta$  197.6, 166.2, 144.5, 144.0, 136.4, 130.1, 130.1, 128.9, 127.3, 127.1, 61.1, 26.7, 14.3.

**4-Methoxybiphenyl (3f) [CAS Reg. No. 613-37-6]<sup>1</sup>**

Obtained in 17% yield (7.9 mg, 42.9  $\mu\text{mol}$ ) from chlorobenzene (28.0 mg, 250  $\mu\text{mol}$ ) and 4-methoxyphenylboronic acid (57.1 mg, 375  $\mu\text{mol}$ ) using 5% Pd/TiO<sub>2</sub> (60mg, 25.0  $\mu\text{mol}$ , Cat. **D**, anatase-type) and Cs<sub>2</sub>CO<sub>3</sub> (163.0 mg, 500  $\mu\text{mol}$ ) in Scheme 1.

Obtained in 42% yield (18.9 mg, 105  $\mu\text{mol}$ ) from chlorobenzene (28.0 mg, 250  $\mu\text{mol}$ ) and 4-methoxyphenylboronic acid (57.1 mg, 375  $\mu\text{mol}$ ) using KO<sup>t</sup>Bu (56.1 mg, 500  $\mu\text{mol}$ ) instead of Cs<sub>2</sub>CO<sub>3</sub> in Scheme 1.

Obtained in 24% yield (11.0 mg, 59.7  $\mu\text{mol}$ ) from 4-chloroanisole (35.6 mg, 250  $\mu\text{mol}$ ) and phenylboronic acid (61.3 mg, 500  $\mu\text{mol}$ ) using 5% Pd/TiO<sub>2</sub> (60mg, 25.0  $\mu\text{mol}$ , Cat. **D**, anatase-type) and Cs<sub>2</sub>CO<sub>3</sub> (244.7 mg, 750  $\mu\text{mol}$ ) in Eq. 1.

Obtained in 85% yield (39.2 mg, 213  $\mu\text{mol}$ ) from 4-bromoanisole (46.8 mg, 250  $\mu\text{mol}$ ) and phenylboronic acid (45.7 mg, 375  $\mu\text{mol}$ ) in Eq. 1.

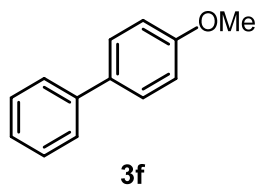

$^1\text{H}$  NMR [400 MHz (ECZ-400,  $\text{CDCl}_3$ )]  $\delta$  7.54 (4H, t,  $J = 9.0$  Hz), 7.43 (2H, t,  $J = 7.6$  Hz), 7.32–7.29 (1H, m), 6.99 (2H, d,  $J = 8.4$  Hz), 3.86 (3H, s);  $^{13}\text{C}$  NMR [100 MHz (ECZ-400,  $\text{CDCl}_3$ )]  $\delta$  159.1, 140.8, 133.7, 128.7, 128.1, 126.7, 126.6, 114.2, 55.3.

#### 4-Acetyl-4'-methoxybiphenyl (3g) [CAS Reg. No. 13021-18-6]<sup>1</sup>

Obtained in 62% yield (34.8 mg, 154  $\mu\text{mol}$ ) from 4'-chloroacetophenone (38.6 mg, 250  $\mu\text{mol}$ ) and 4-methoxyphenylboronic acid (57.0 mg, 375  $\mu\text{mol}$ ).

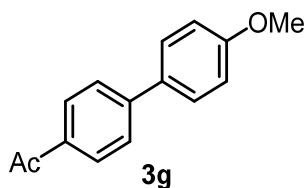

$^1\text{H}$  NMR [400 MHz (ECZ-400,  $\text{CDCl}_3$ )]  $\delta$  8.00 (2H, d,  $J = 8.2$  Hz), 7.63 (2H, d,  $J = 8.2$  Hz), 7.57 (2H, d,  $J = 8.8$  Hz), 6.99 (2H, d,  $J = 8.8$  Hz), 3.85 (3H, s), 2.62 (3H, s);  $^{13}\text{C}$  NMR [100 MHz (ECZ-400,  $\text{CDCl}_3$ )]  $\delta$  197.7, 159.8, 145.3, 135.2, 132.1, 128.9, 128.3, 126.5, 114.3, 55.3, 26.6.

#### 4-Acetyl-3'-methoxybiphenyl (3h) [CAS Reg. No. 76650-30-1]<sup>1</sup>

Obtained in 56% yield (31.7 mg, 140  $\mu\text{mol}$ ) from 4'-chloroacetophenone (38.6 mg, 250  $\mu\text{mol}$ ) and 3-methoxyphenylboronic acid (57.0 mg, 375  $\mu\text{mol}$ ).

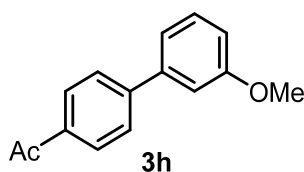

$^1\text{H}$  NMR [400 MHz (ECZ-400,  $\text{CDCl}_3$ )]  $\delta$  8.02 (2H, d,  $J = 8.4$  Hz), 7.67 (2H, d,  $J = 8.4$  Hz), 7.38 (1H, t,  $J = 8.0$  Hz), 7.20 (1H, d,  $J = 8.2$  Hz), 7.14 (1H, t,  $J = 1.8$  Hz), 6.94 (1H, dd,  $J = 8.2$  Hz, 1.8 Hz), 3.87 (3H, s), 2.63 (3H, s);  $^{13}\text{C}$  NMR [100 MHz (ECZ-400,  $\text{CDCl}_3$ )]  $\delta$  197.7, 160.0, 145.6, 141.3, 135.9, 129.9, 128.8, 127.2, 119.7, 113.5, 113.0, 55.3, 26.6.

#### 4-Acetyl-2'-methoxybiphenyl (3i) [CAS Reg. No. 52807-17-7]<sup>1</sup>

Obtained in 43% yield (24.5 mg, 108  $\mu\text{mol}$ ) from 4'-chloroacetophenone (38.6 mg, 250  $\mu\text{mol}$ ) and 2-methoxyphenylboronic acid (57.0 mg, 375  $\mu\text{mol}$ ).

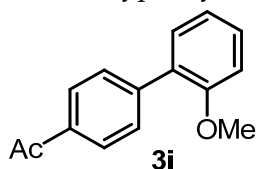

$^1\text{H}$  NMR [400 MHz (ECZ-400,  $\text{CDCl}_3$ )]  $\delta$  8.00 (2H, d,  $J = 8.6$  Hz), 7.63 (2H, d,  $J = 8.6$  Hz), 7.38–7.32 (2H, m), 7.07–6.99 (2H, m), 3.82 (3H, s), 2.63 (3H, s);  $^{13}\text{C}$  NMR [100 MHz (ECZ-400,  $\text{CDCl}_3$ )]  $\delta$  197.9, 156.4, 143.5, 135.4, 130.7, 129.7, 129.4, 129.4, 128.0, 120.9, 111.2, 55.5, 26.6.

#### 1-[4-(2-Benzofuranyl)phenyl]ethanone (3j) [CAS Reg. No. 132932-61-7]<sup>1</sup>

Obtained in 51% yield (29.9 mg, 127  $\mu\text{mol}$ ) from 4'-chloroacetophenone (38.6 mg, 250  $\mu\text{mol}$ ) and benzofuran-2-boronic acid (60.5 mg, 375  $\mu\text{mol}$ ).

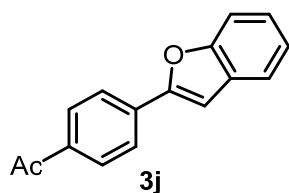

$^1\text{H}$  NMR [400 MHz (ECZ-400,  $\text{CDCl}_3$ )]  $\delta$  8.03 (2H, d,  $J = 8.0$  Hz), 7.93 (2H, d,  $J = 8.4$  Hz), 7.61 (1H, d,  $J = 7.6$  Hz), 7.54 (1H, d,  $J = 7.6$  Hz), 7.33 (1H, dt,  $J = 1.2$  Hz,  $J = 7.8$  Hz), 7.26 (1H, t,  $J = 7.4$  Hz), 7.16 (1H, s), 2.63 (3H, s);  $^{13}\text{C}$  NMR [100 MHz (ECZ400,  $\text{CDCl}_3$ )]  $\delta$  197.3, 155.1, 154.5, 136.5, 134.5, 128.9, 128.8, 125.1, 124.7, 123.2, 121.3, 111.3, 103.6, 26.6.

### 1-[4-(4-dibenzofuranyl)phenyl]ethanone (3k) [CAS Reg. No.756484-37-4]<sup>2</sup>

Obtained in 98% yield (70.2 mg, 245  $\mu\text{mol}$ ) from ethyl 4'-chloroacetophenone (38.6 mg, 250  $\mu\text{mol}$ ) and 4-dibenzofurylboronic acid (79.5 mg, 375  $\mu\text{mol}$ ).

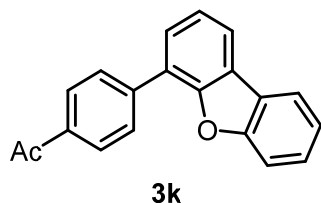

$^1\text{H}$  NMR [400 MHz (ECZ-400,  $\text{CDCl}_3$ )]  $\delta$  8.09 (2H, d,  $J = 8.8$  Hz), 8.00–7.94 (4H, m), 7.59 (2H, t,  $J = 6.2$  Hz), 7.48–7.34 (3H, m), 2.65 (3H, s);  $^{13}\text{C}$  NMR [100 MHz (ECZ-400,  $\text{CDCl}_3$ )]  $\delta$  197.7, 156.0, 153.2, 141.1, 136.0, 128.8, 128.6, 127.4, 126.7, 125.1, 124.4, 123.9, 123.2, 122.9, 120.7, 120.6, 111.8, 26.6.

## 7. $^1\text{H}$ and $^{13}\text{C}$ NMR spectra of products

### $^1\text{H}$ NMR of 4-acetylbiphenyl (3a)

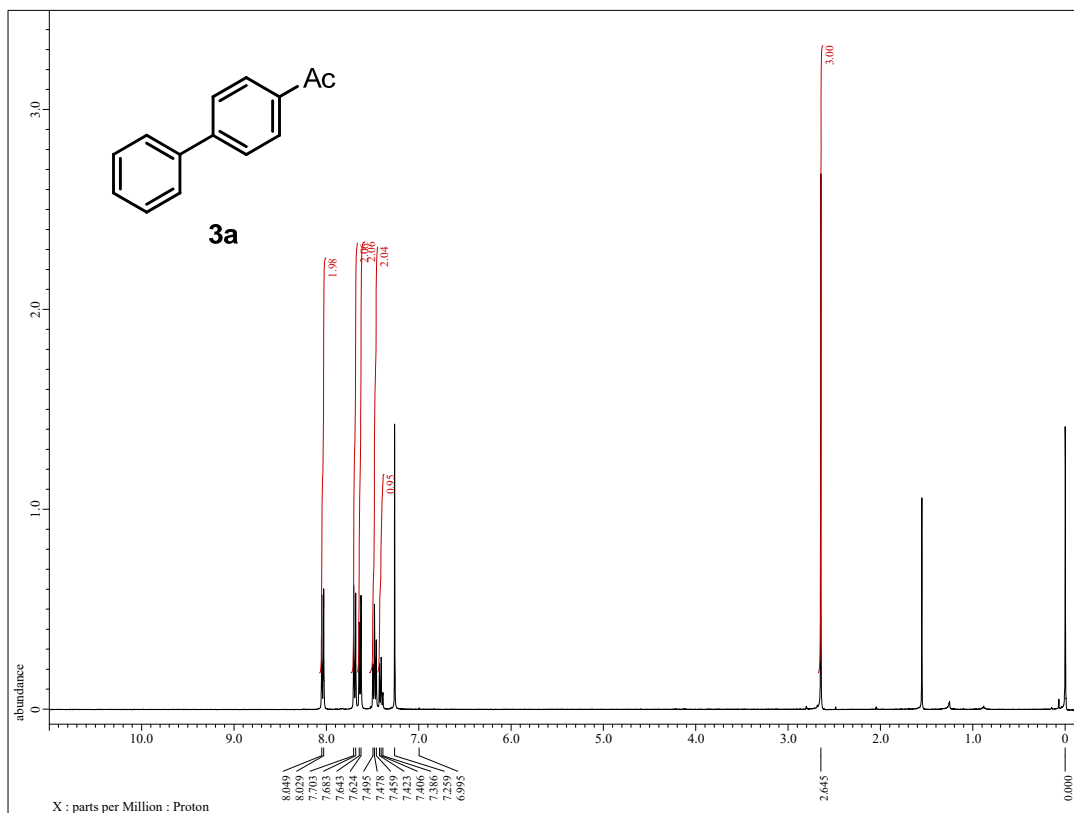

### $^{13}\text{C}$ NMR of 4-acetylbiphenyl (3a)

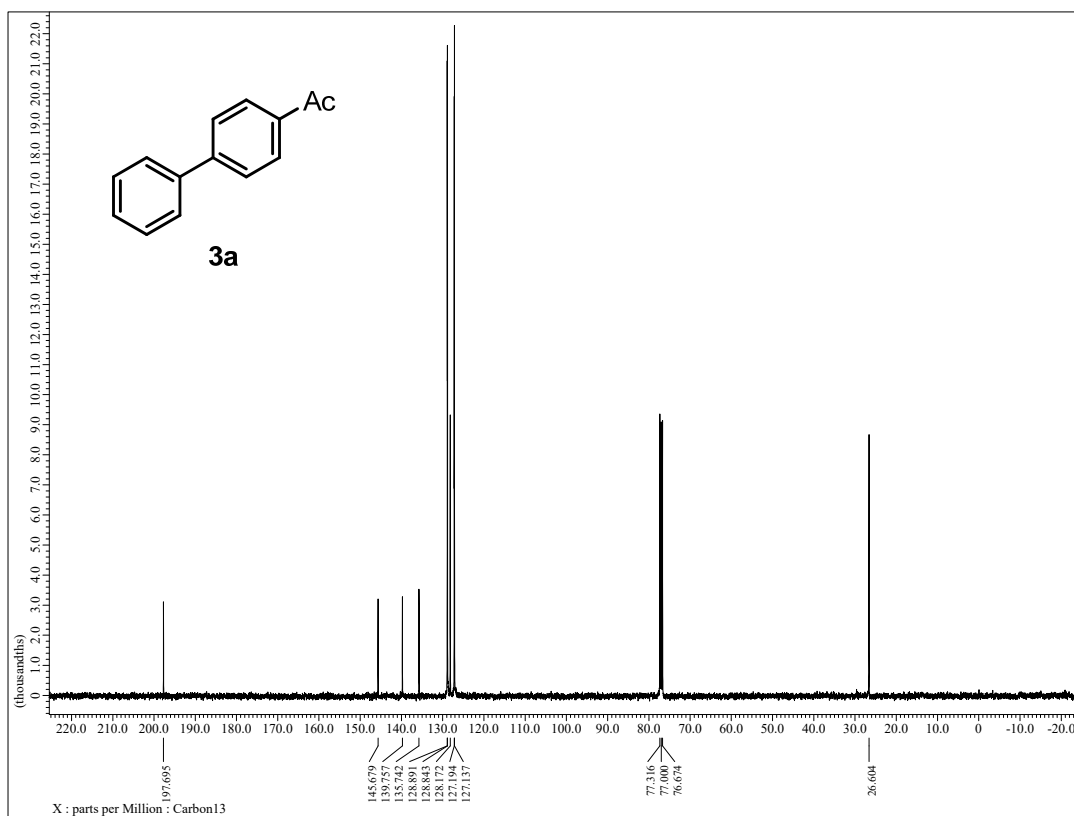

### $^1\text{H}$ NMR of 3-acetylbiphenyl (3b)

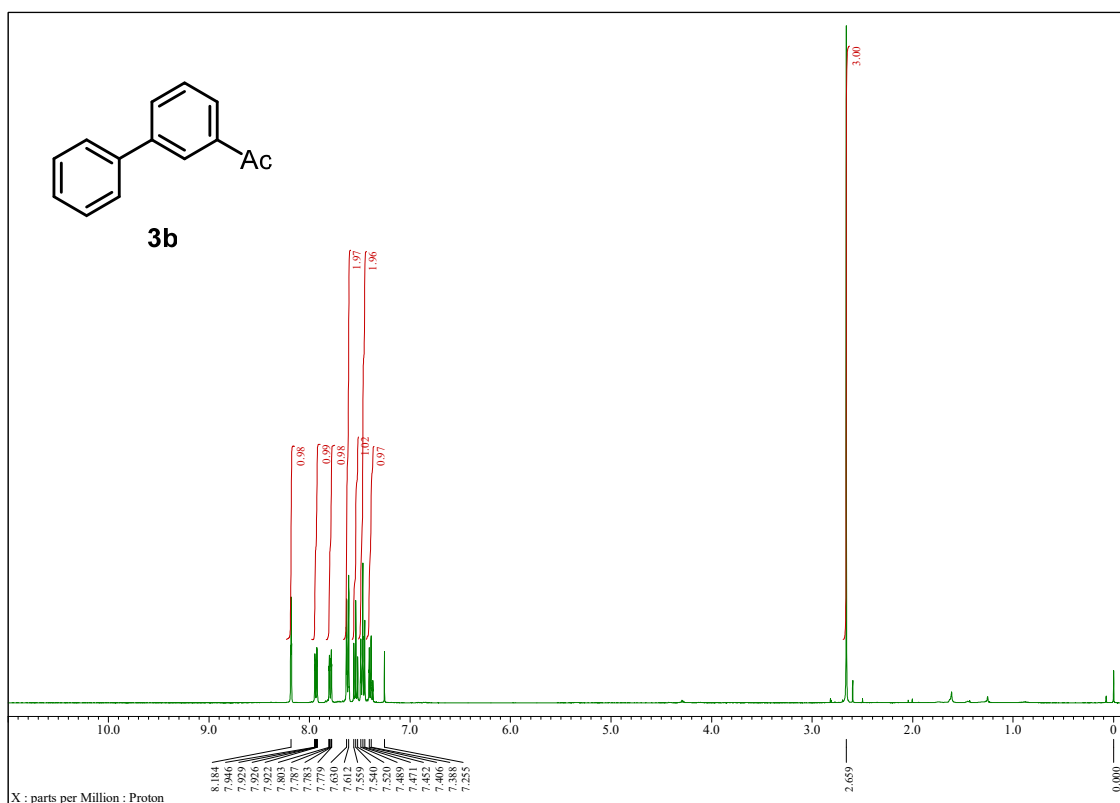<sup>13</sup>C NMR of 3-acetylbiphenyl (3b)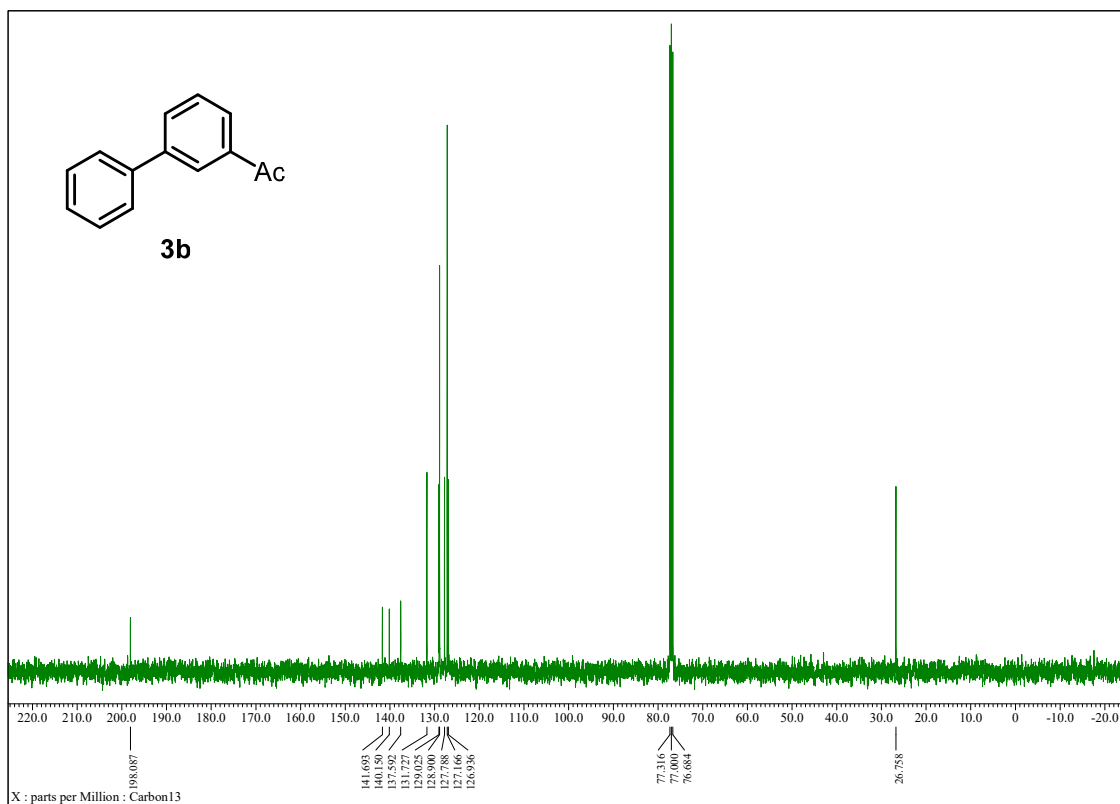<sup>1</sup>H NMR of 2-acetylbiphenyl (3c)

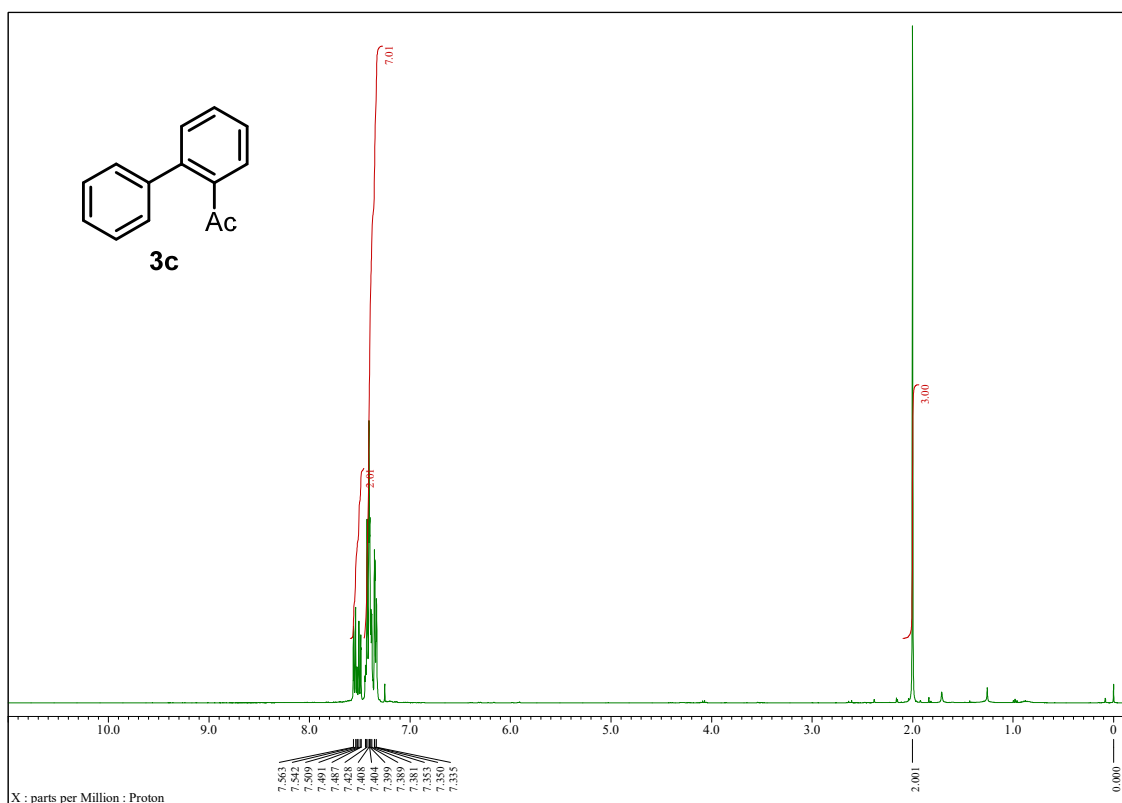**<sup>13</sup>C NMR of 2-acetylbiphenyl (3c)**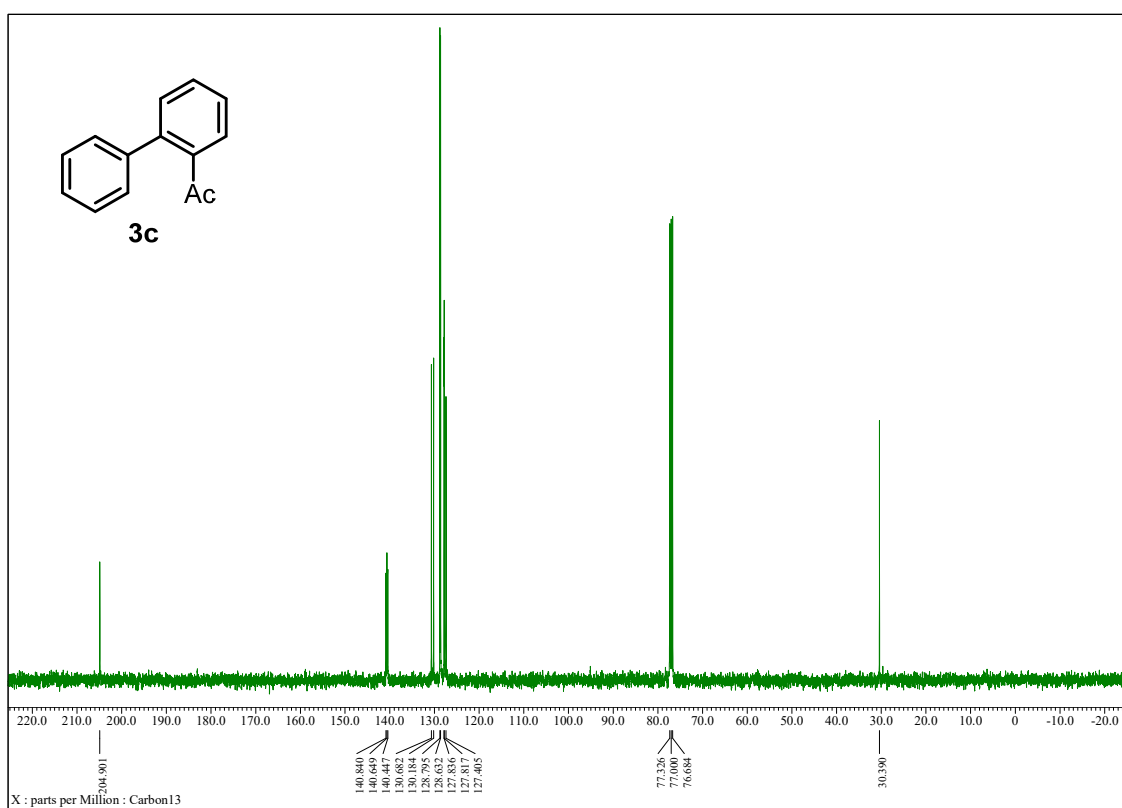**<sup>1</sup>H NMR of ethyl biphenyl-4-carboxylate (3d)**

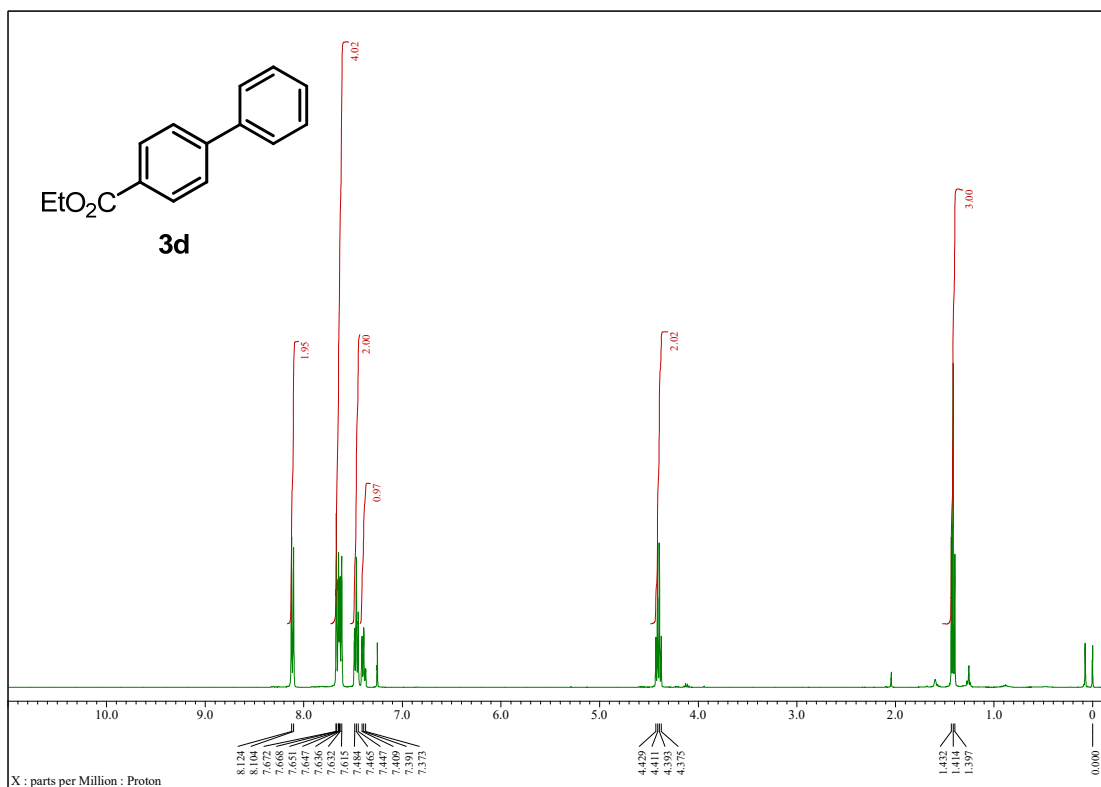**<sup>13</sup>C NMR of ethyl biphenyl-4-carboxylate (3d)**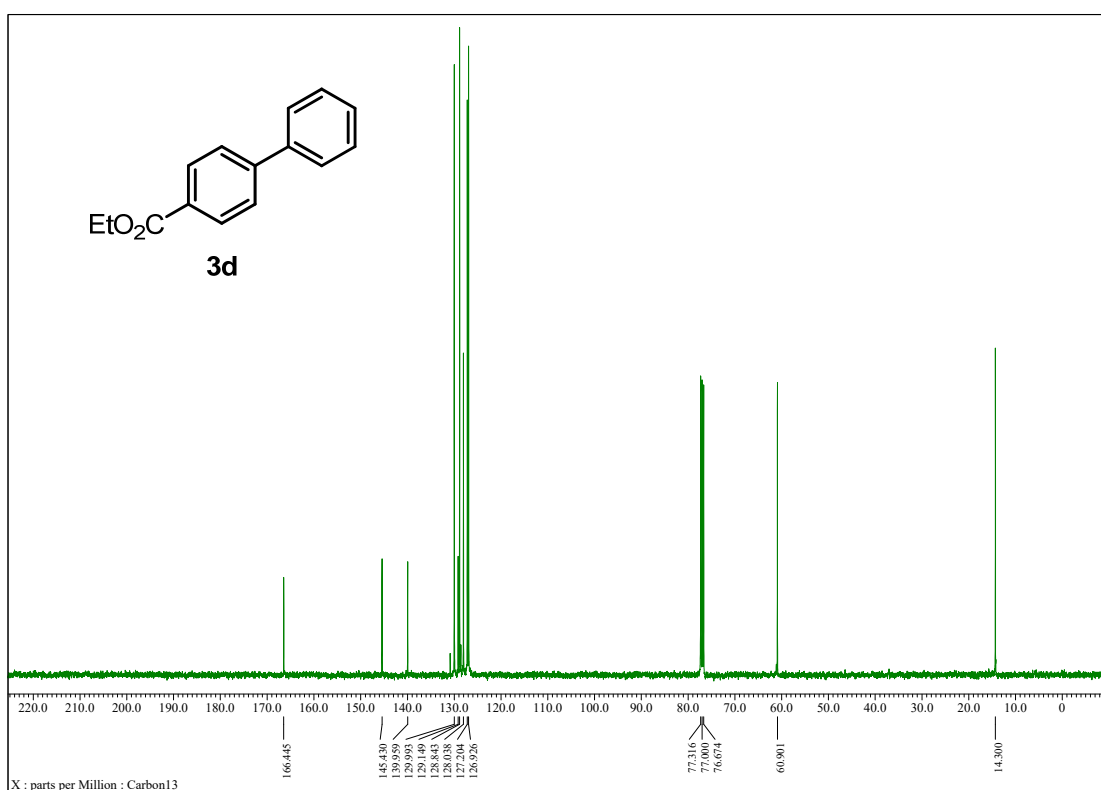**<sup>1</sup>H NMR of ethyl 4'-acetyl-[1,1'-biphenyl]-4-carboxylate (3e)**

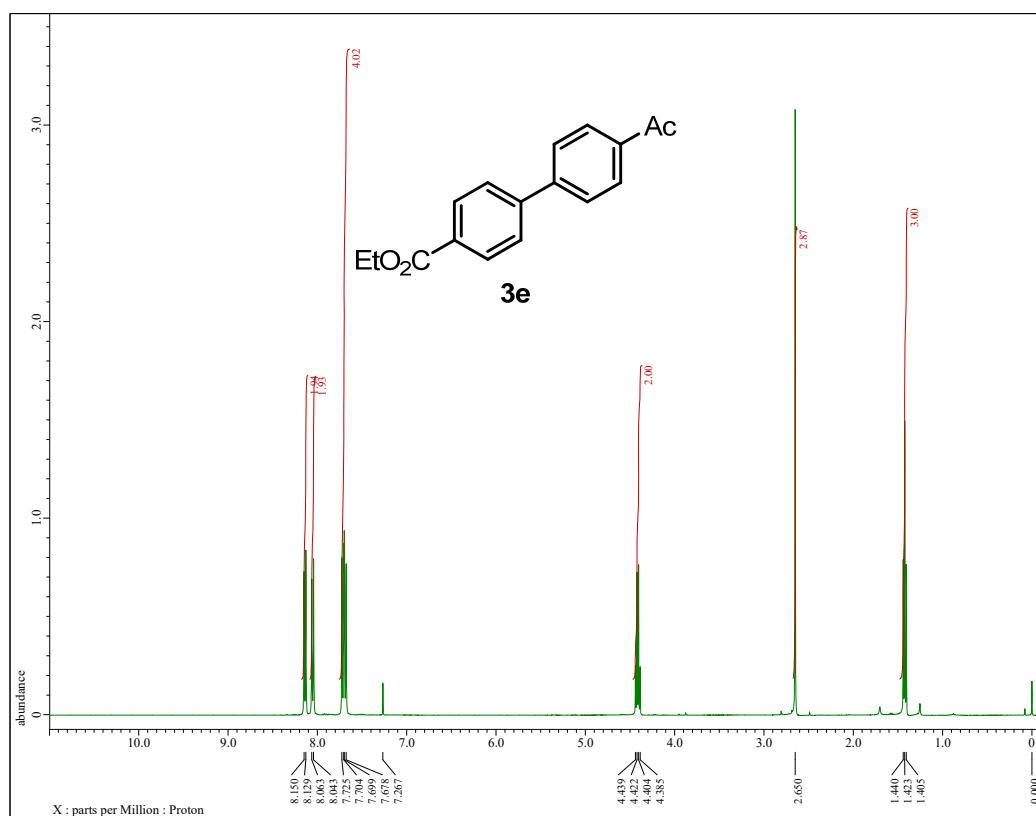

**<sup>13</sup>C NMR of ethyl 4'-acetyl-[1,1'-biphenyl]-4-carboxylate (3e)**

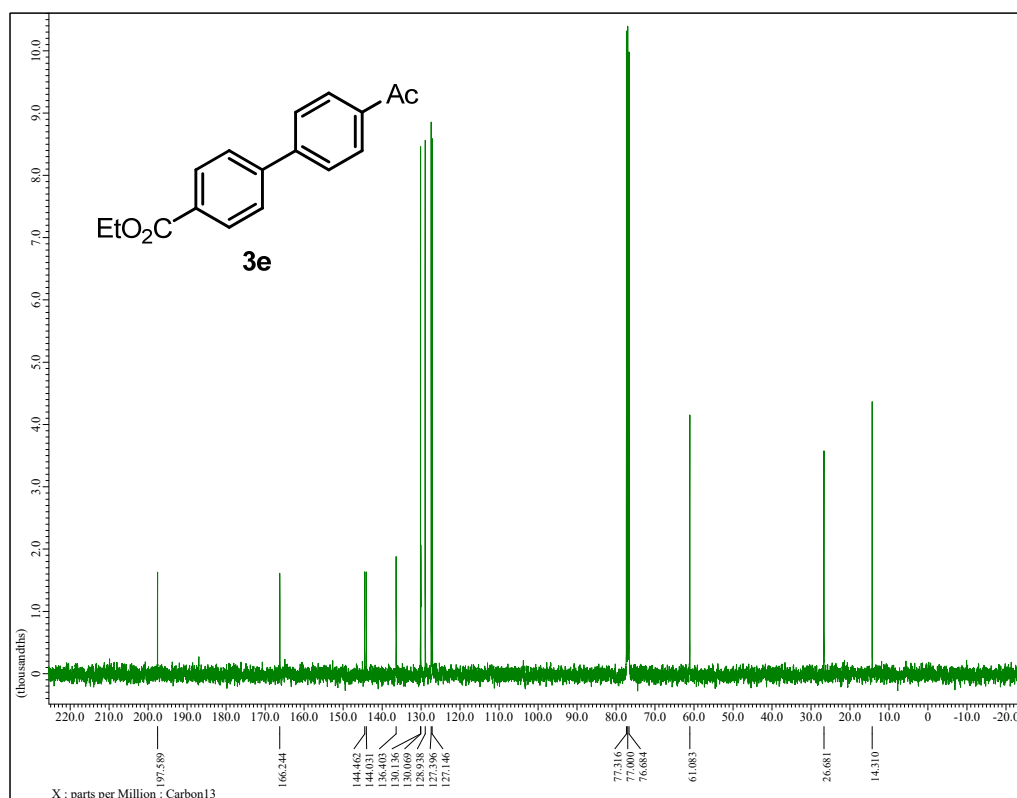

**<sup>1</sup>H NMR of 4-methoxybiphenyl (3f) from chlorobenzene and 4-methoxyphenylboronic acid using Cs<sub>2</sub>CO<sub>3</sub> (Scheme 1)**

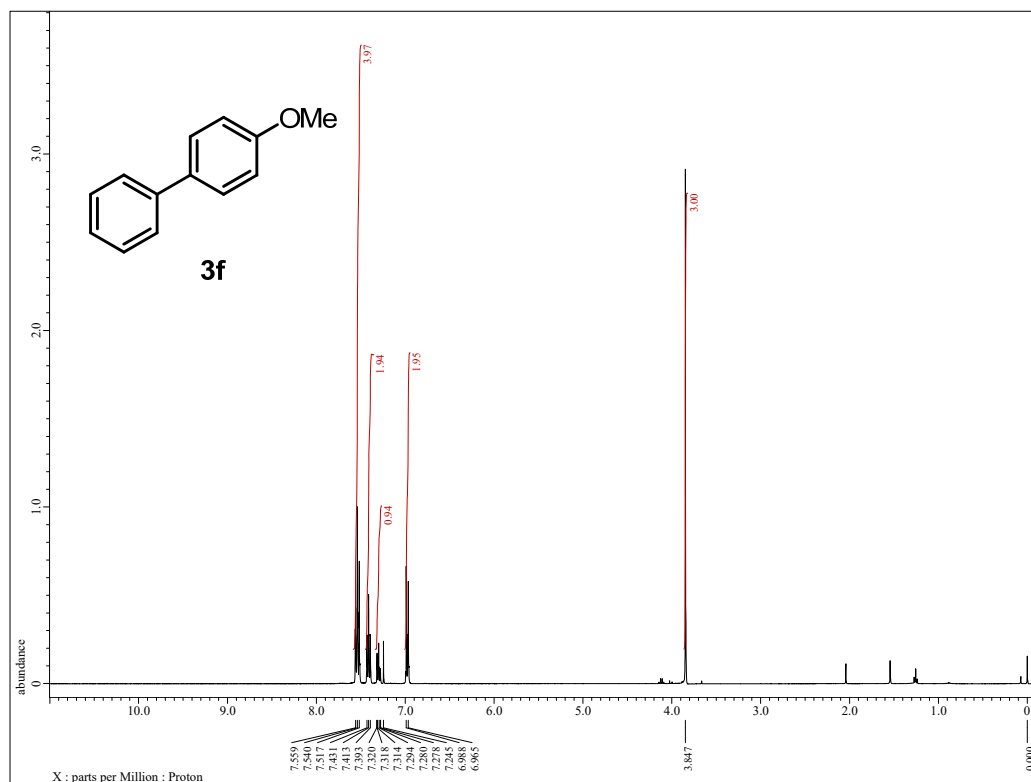

**<sup>1</sup>H NMR of 4-methoxybiphenyl (3f) from chlorobenzene and 4-methoxyphenylboronic acid using Cs<sub>2</sub>CO<sub>3</sub> (Scheme 1)**

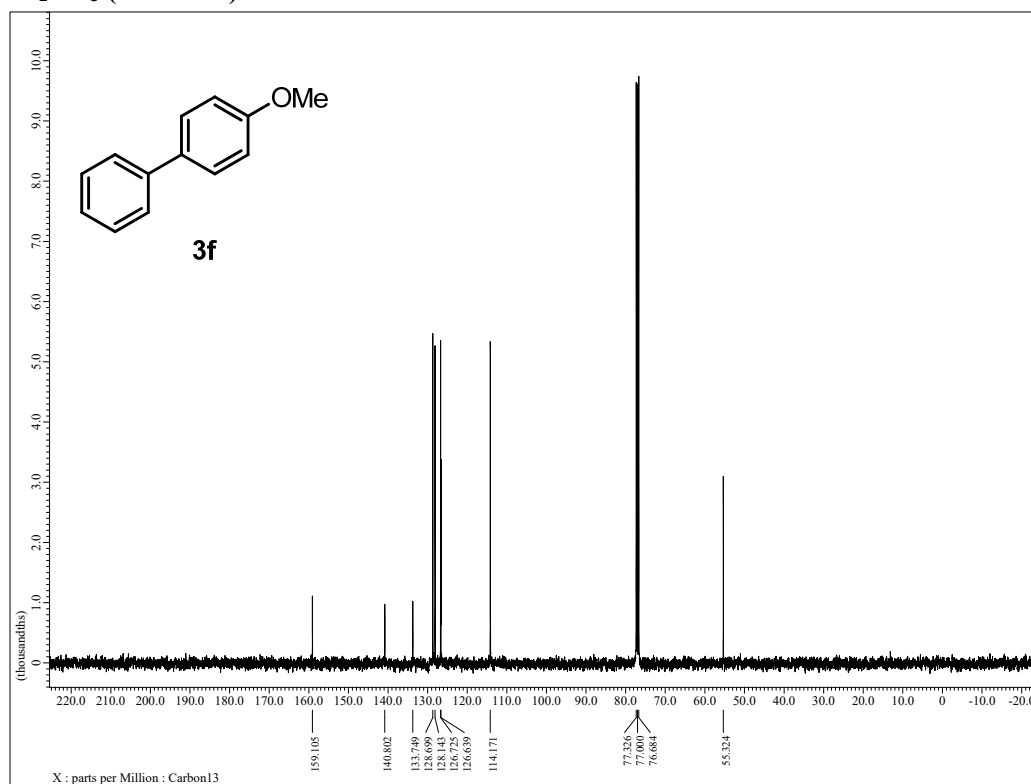

**<sup>13</sup>C NMR of 4-methoxybiphenyl (3f) from chlorobenzene and 4-methoxyphenylboronic acid using KOtBu instead of Cs<sub>2</sub>CO<sub>3</sub> (Scheme 1)**

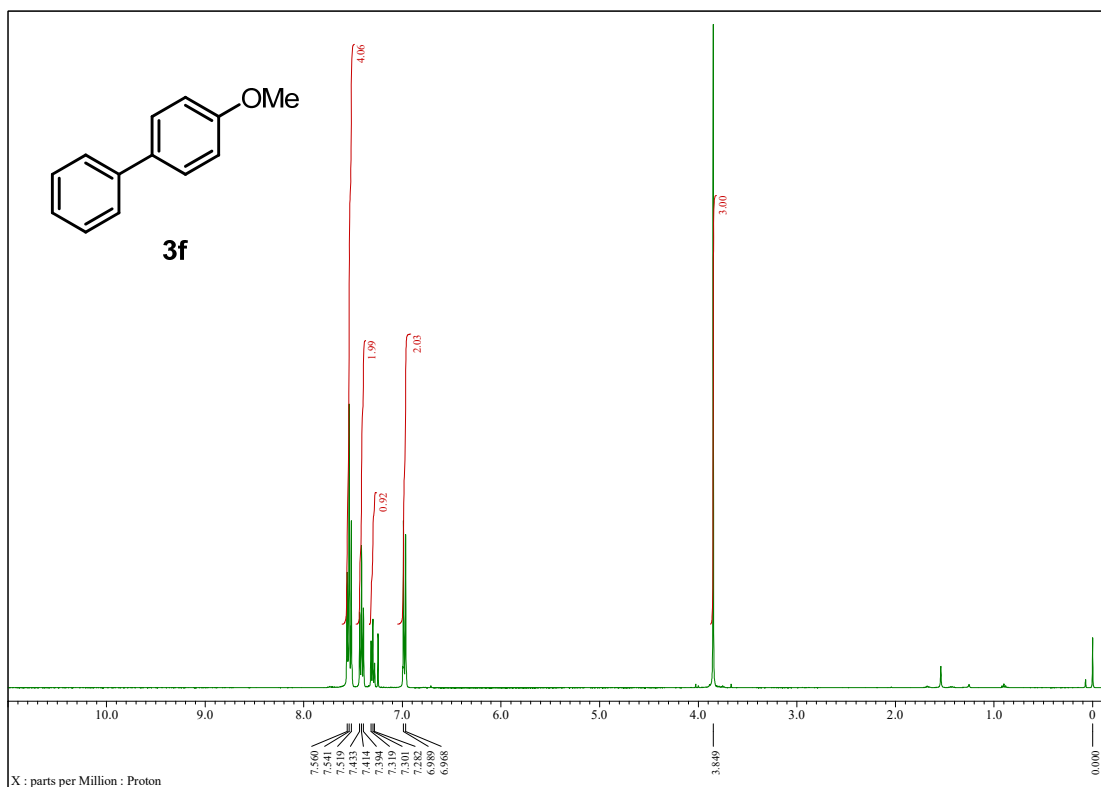

**<sup>1</sup>H NMR of 4-methoxybiphenyl (3f) from chlorobenzene and 4-methoxyphenylboronic acid using KO<sup>t</sup>Bu instead of Cs<sub>2</sub>CO<sub>3</sub> (Scheme 1)**

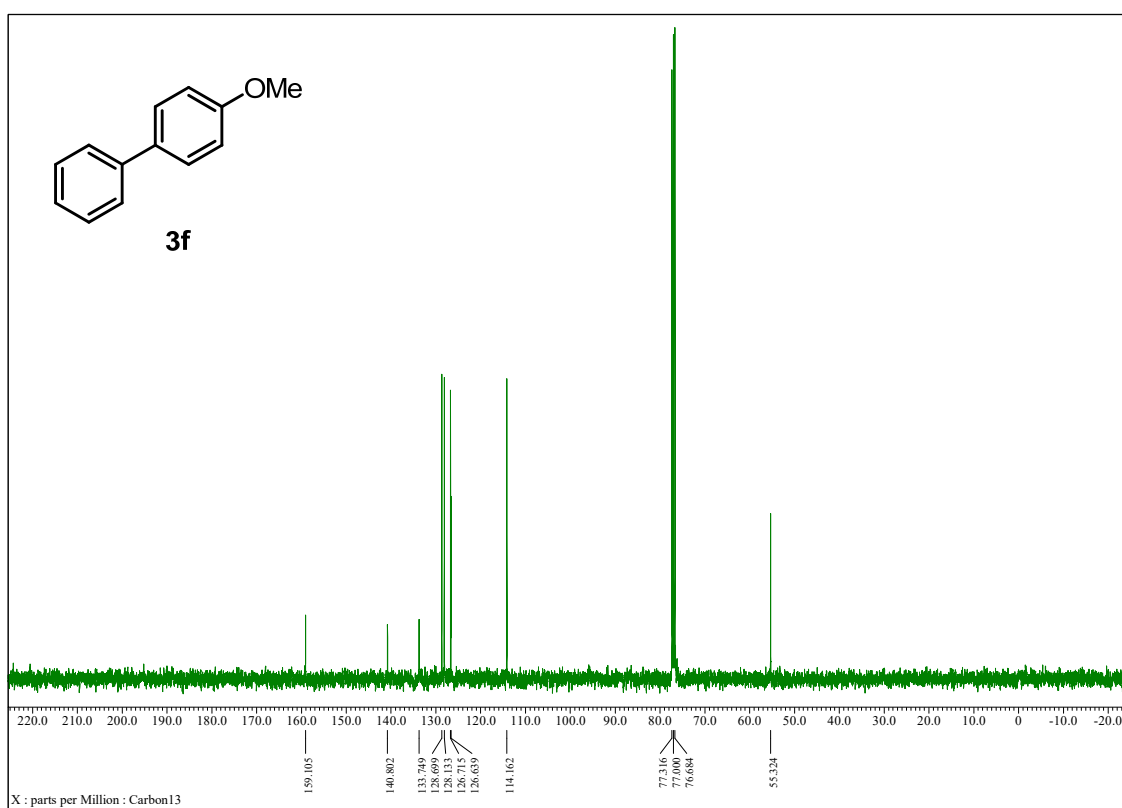

**<sup>13</sup>C NMR of 4-methoxybiphenyl (3f) from 4-chloroanisole and phenylboronic acid using Cs<sub>2</sub>CO<sub>3</sub> (eq. 1)**

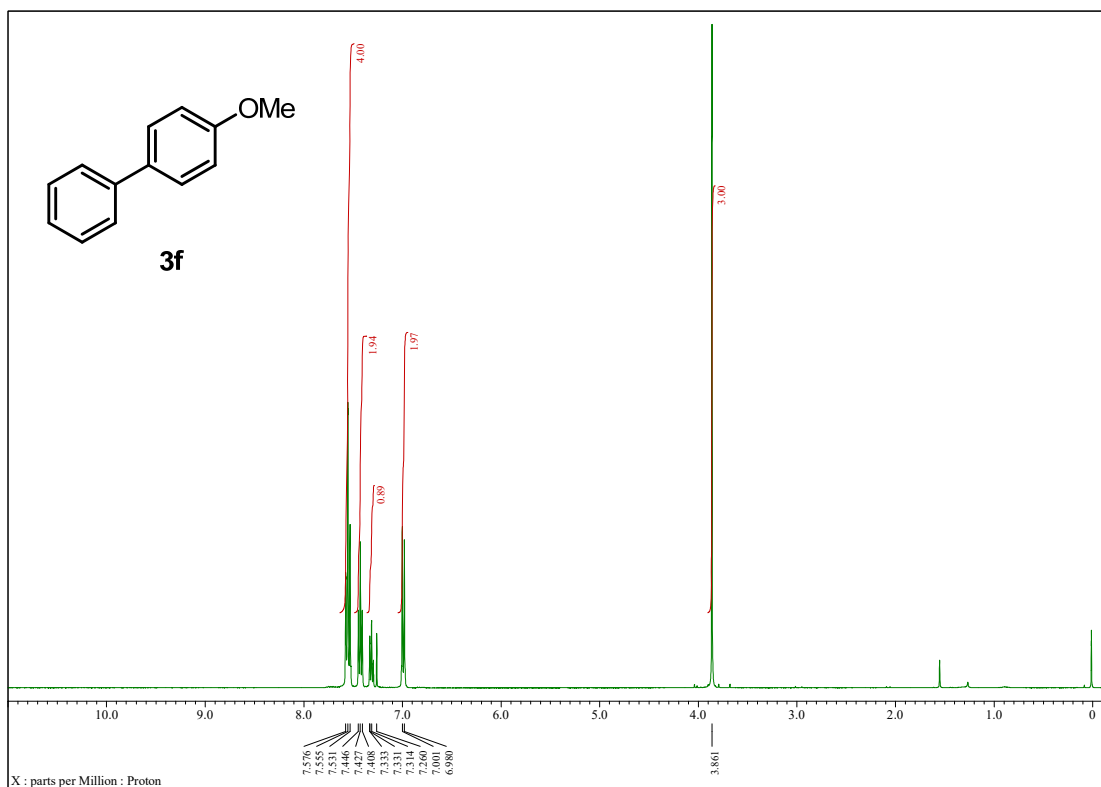

**<sup>13</sup>C NMR of 4-methoxybiphenyl (3f) from 4-chloroanisole and phenylboronic acid using Cs<sub>2</sub>CO<sub>3</sub> (eq. 1)**

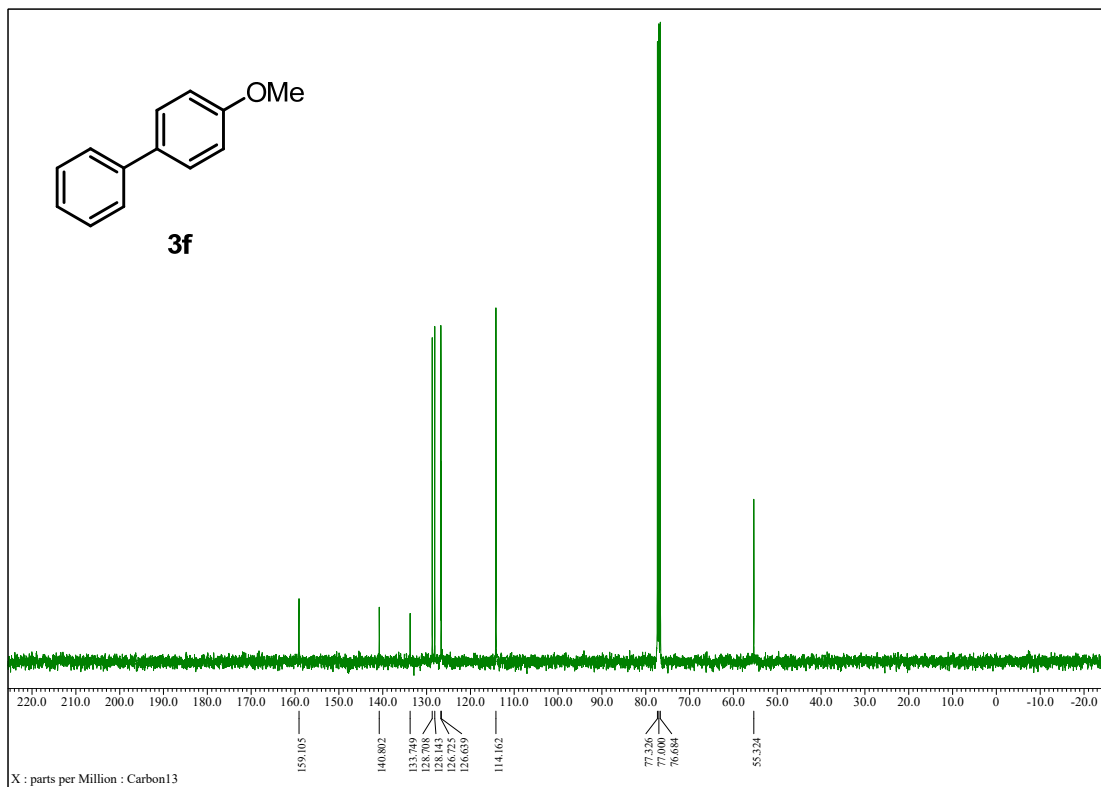

**<sup>1</sup>H NMR of 4-methoxybiphenyl (3f) from 4-bromoanisole and phenylboronic acid (eq. 1)**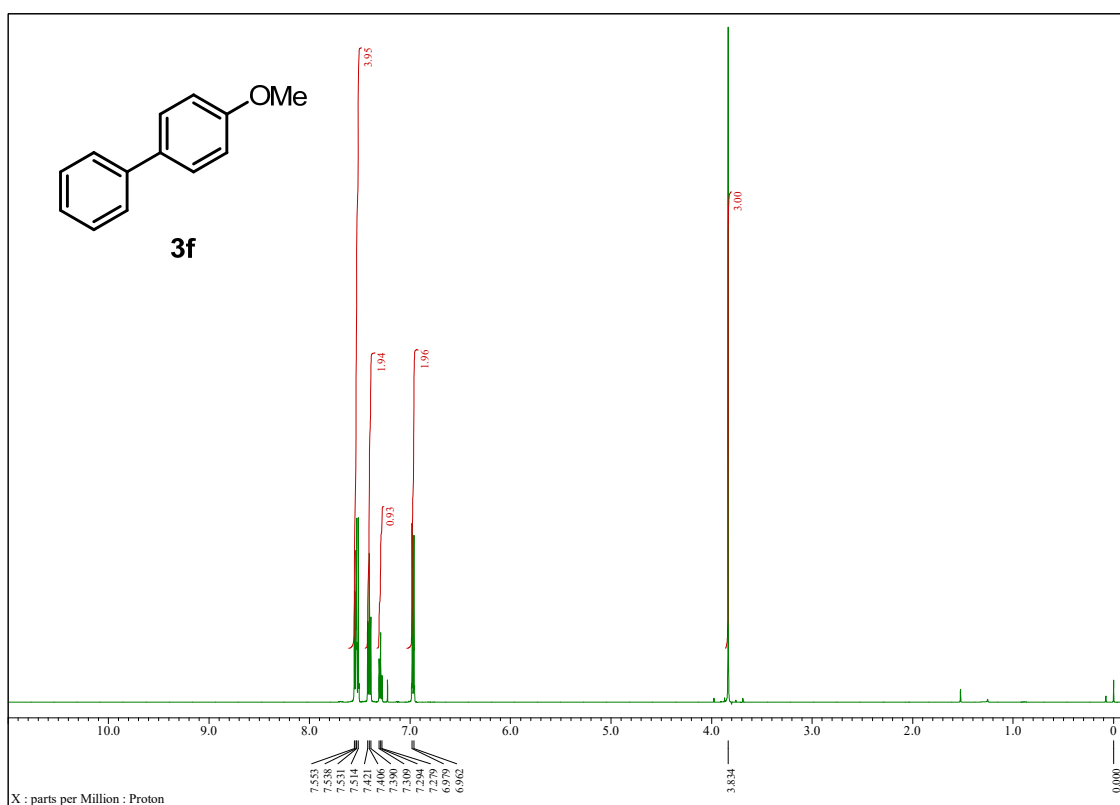**<sup>13</sup>C NMR of 4-methoxybiphenyl (3f) from 4-bromoanisole and phenylboronic acid (eq. 1)**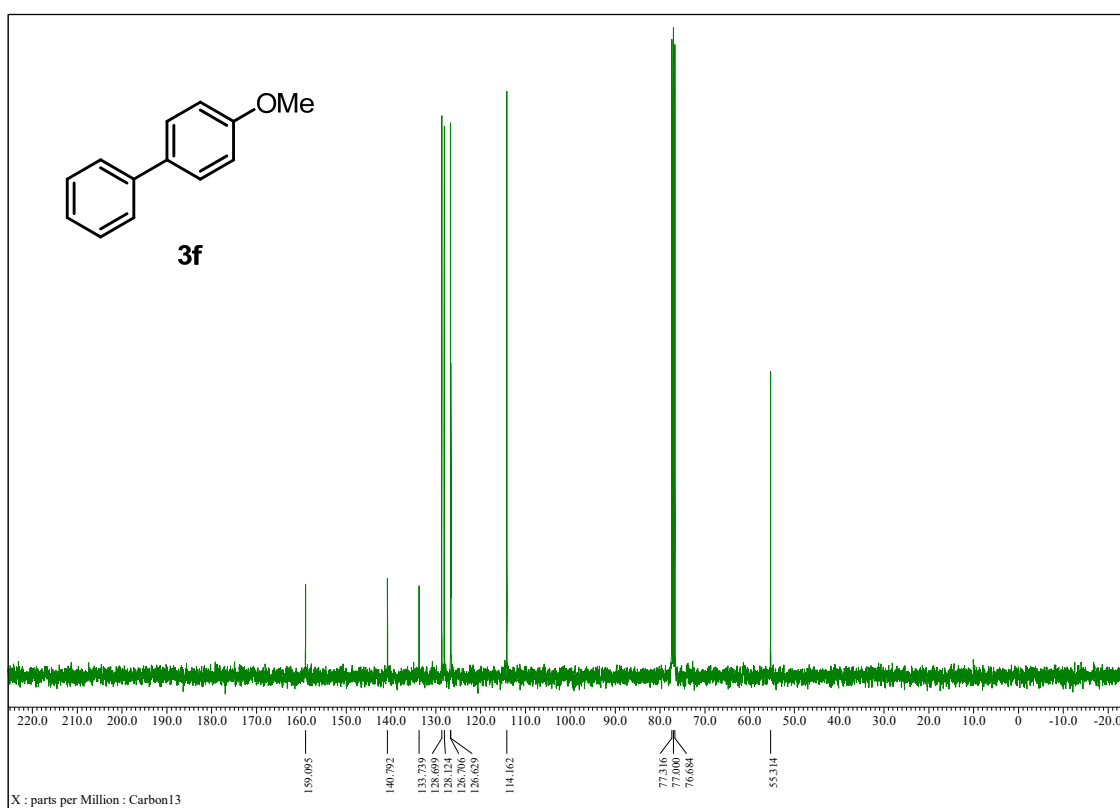**<sup>1</sup>H NMR of 4-acetyl-4'-methoxybiphenyl (3g)**

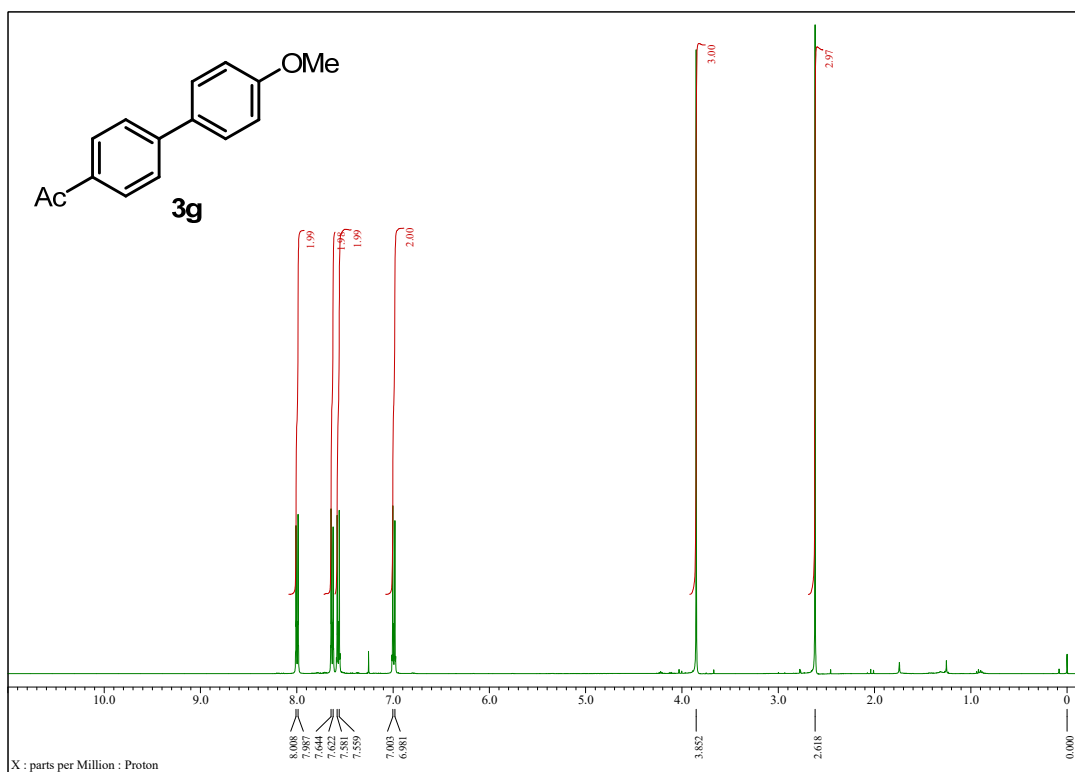

### <sup>13</sup>C NMR of 4-acetyl-4'-methoxybiphenyl (**3g**)

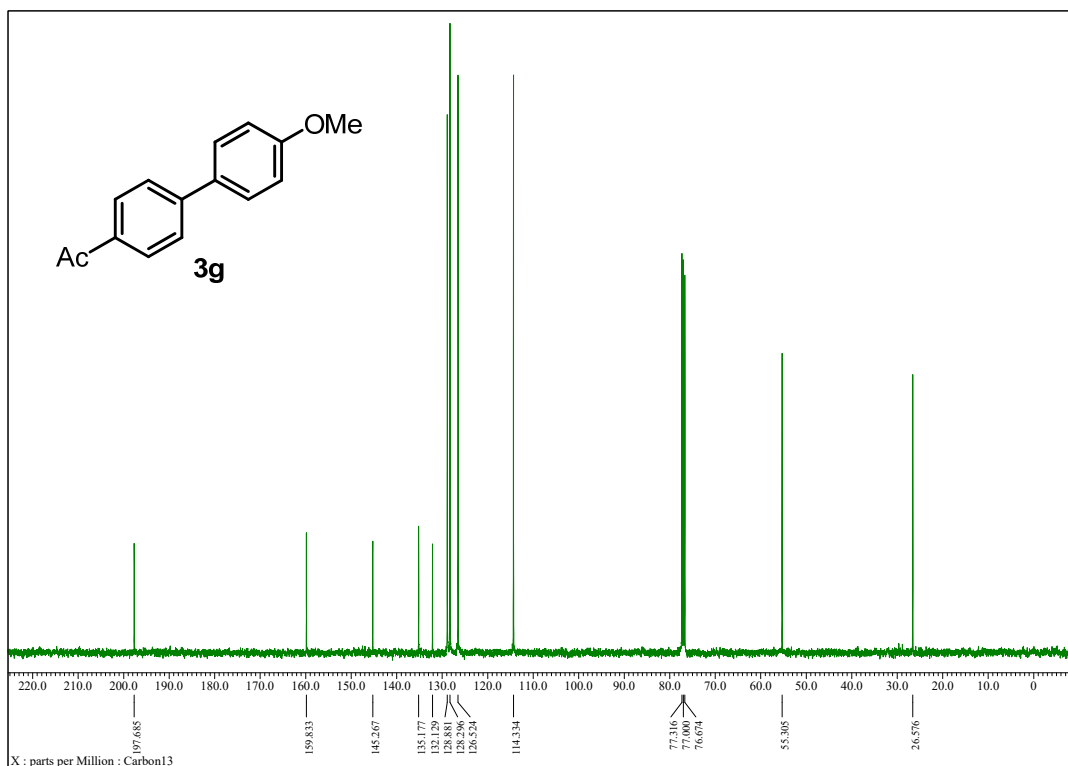

### <sup>1</sup>H NMR of 4-acetyl-3'-methoxybiphenyl (**3h**)

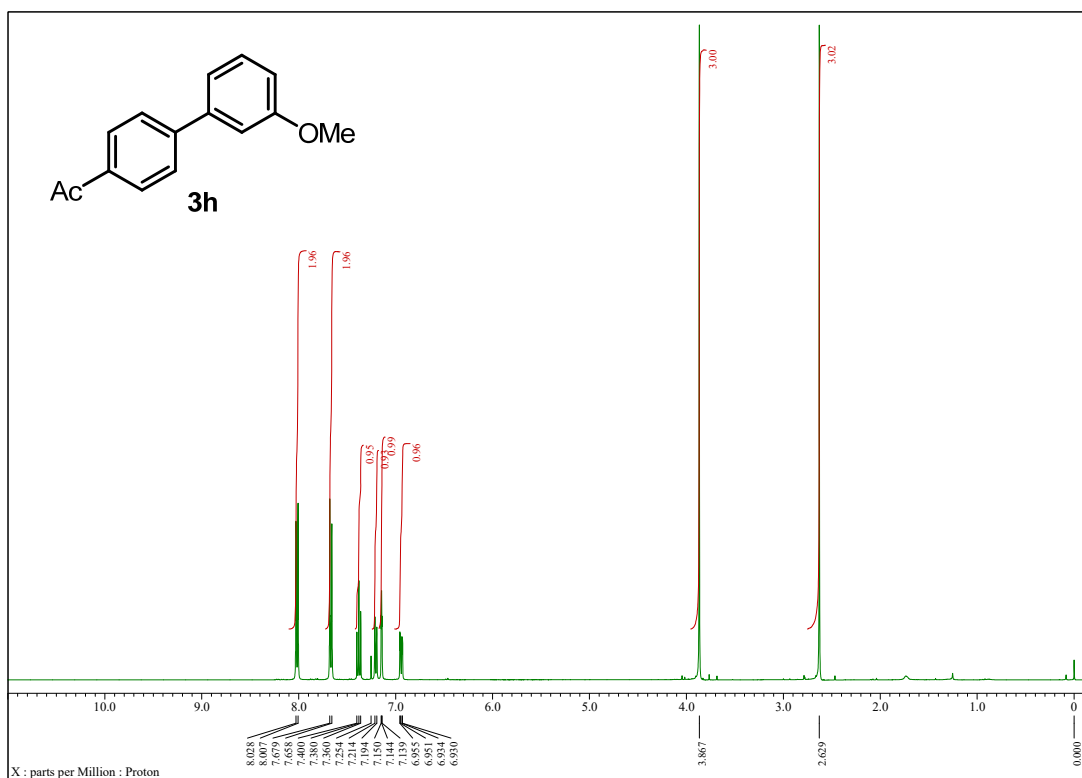**<sup>13</sup>C NMR of 4-acetyl-3'-methoxybiphenyl (3h)**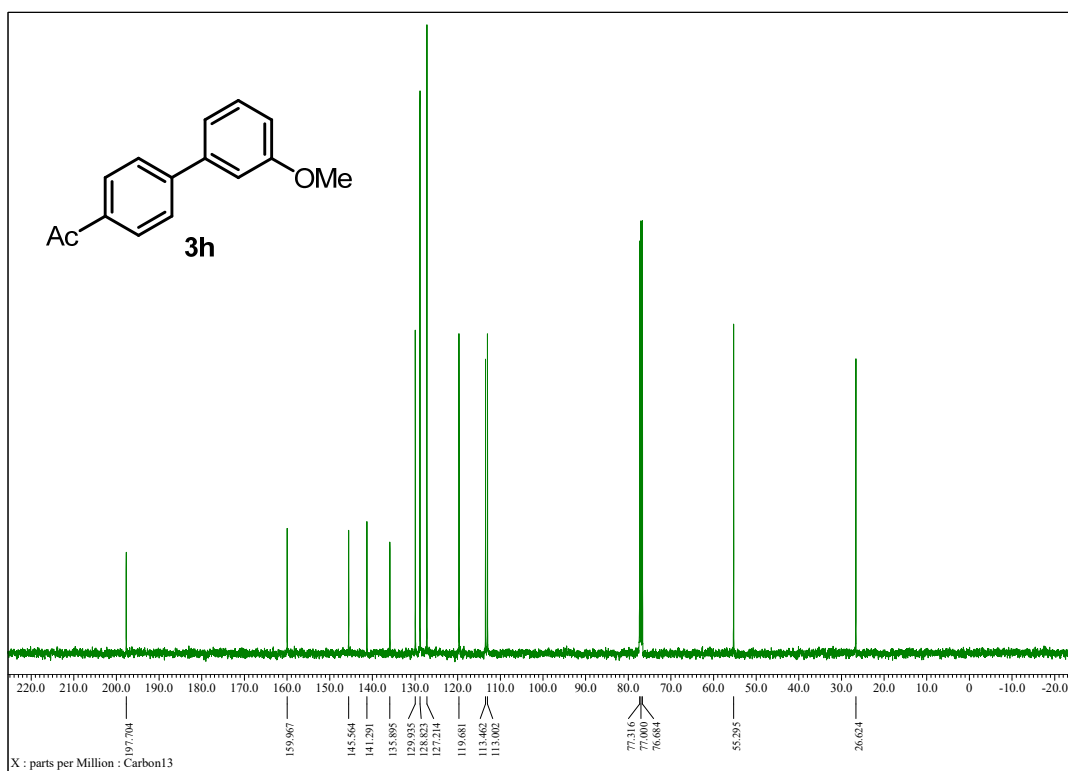**<sup>1</sup>H NMR of 4-acetyl-2'-methoxybiphenyl (3i)**

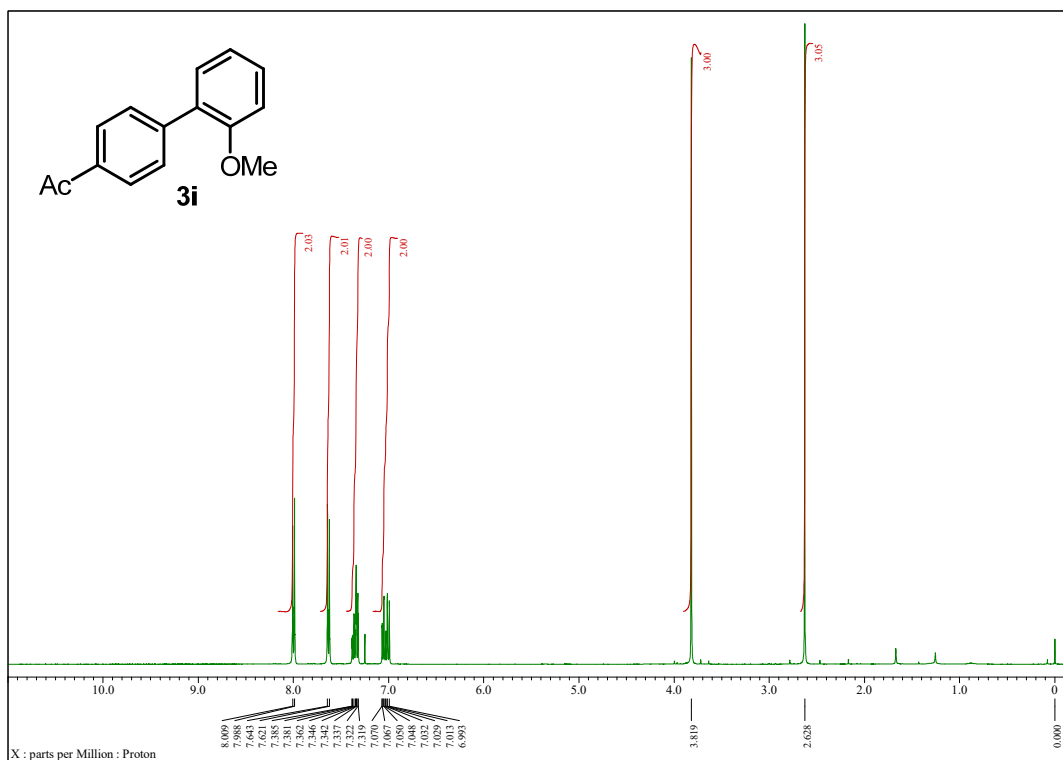**<sup>13</sup>C NMR of 4-acetyl-2'-methoxybiphenyl (3i)**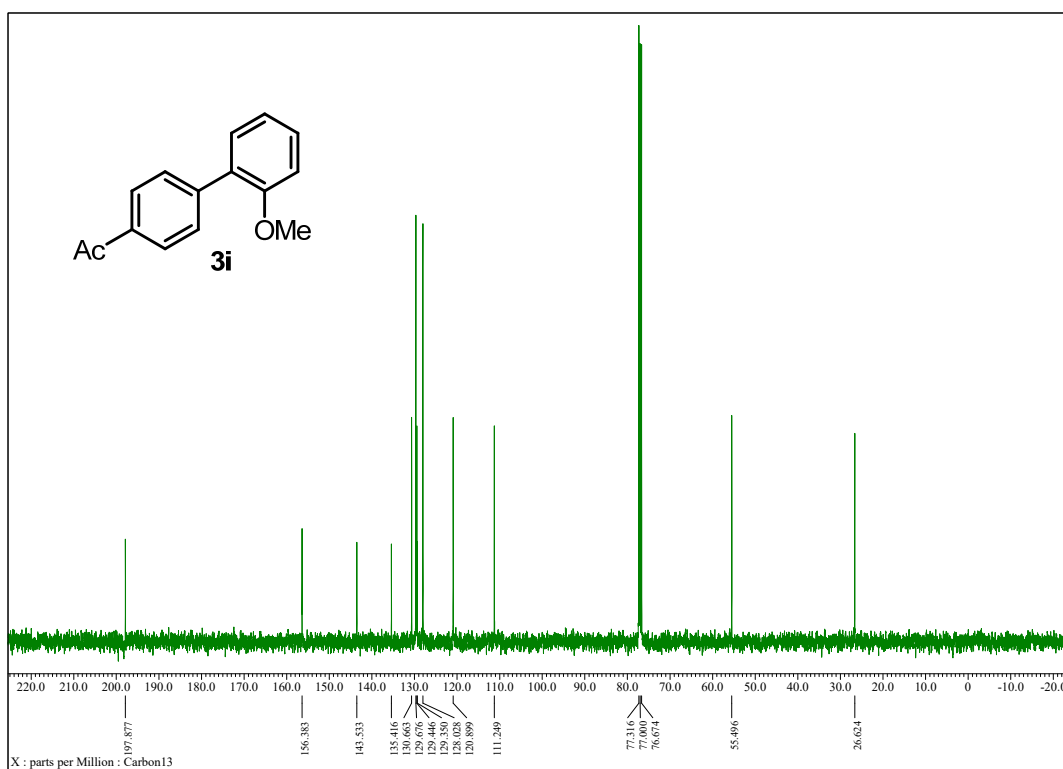**<sup>1</sup>H NMR of 1-[4-(2-benzofuranyl)phenyl]ethanone (3j)**

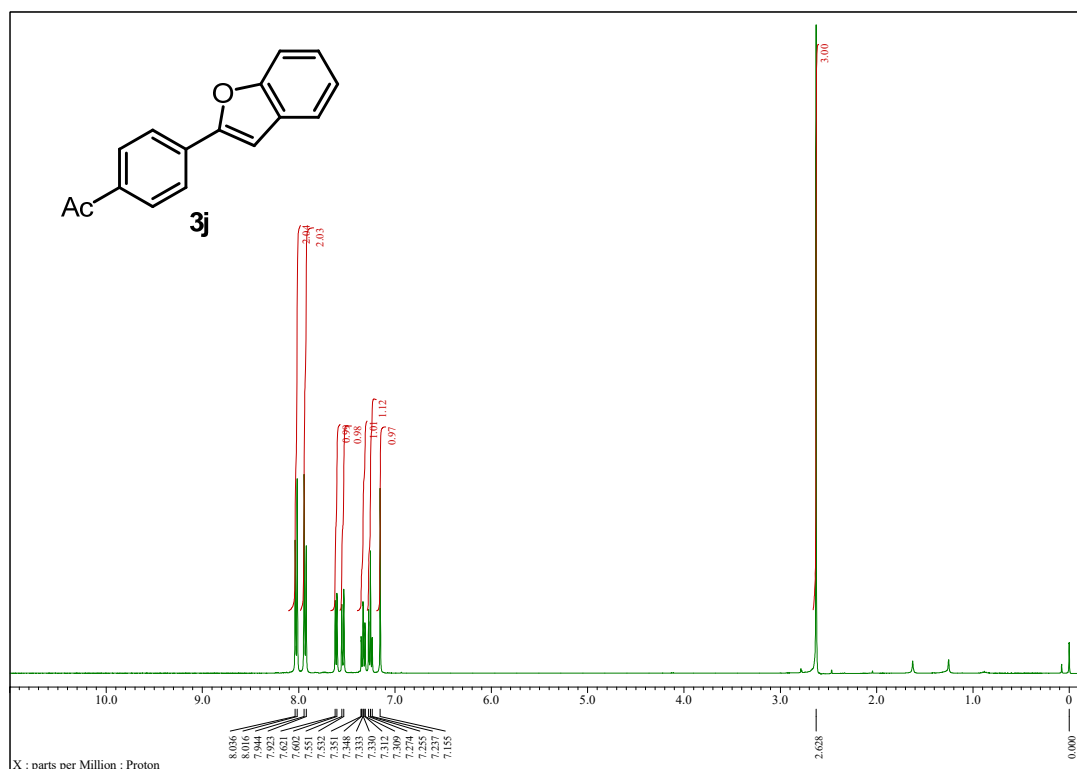

**<sup>13</sup>C NMR of 1-[4-(2-benzofuranyl)phenyl]ethanone (3j)**

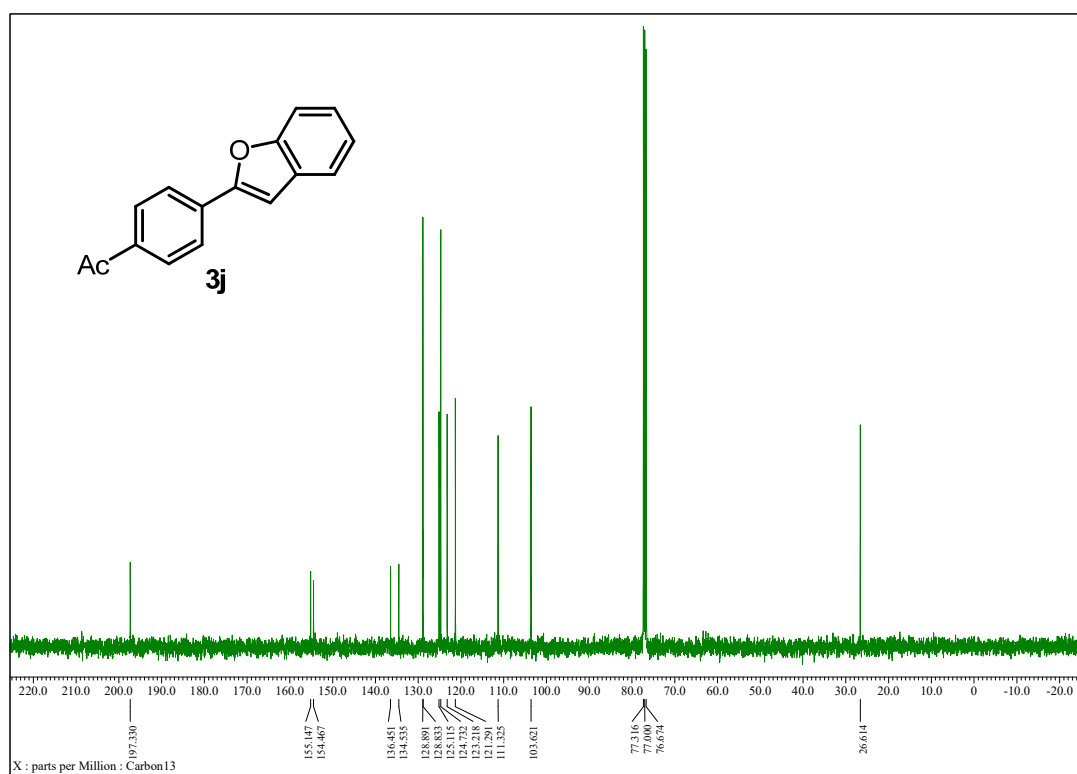

### <sup>1</sup>H NMR of 1-[4-(4-dibenzofuranyl)phenyl]ethanone (3k)

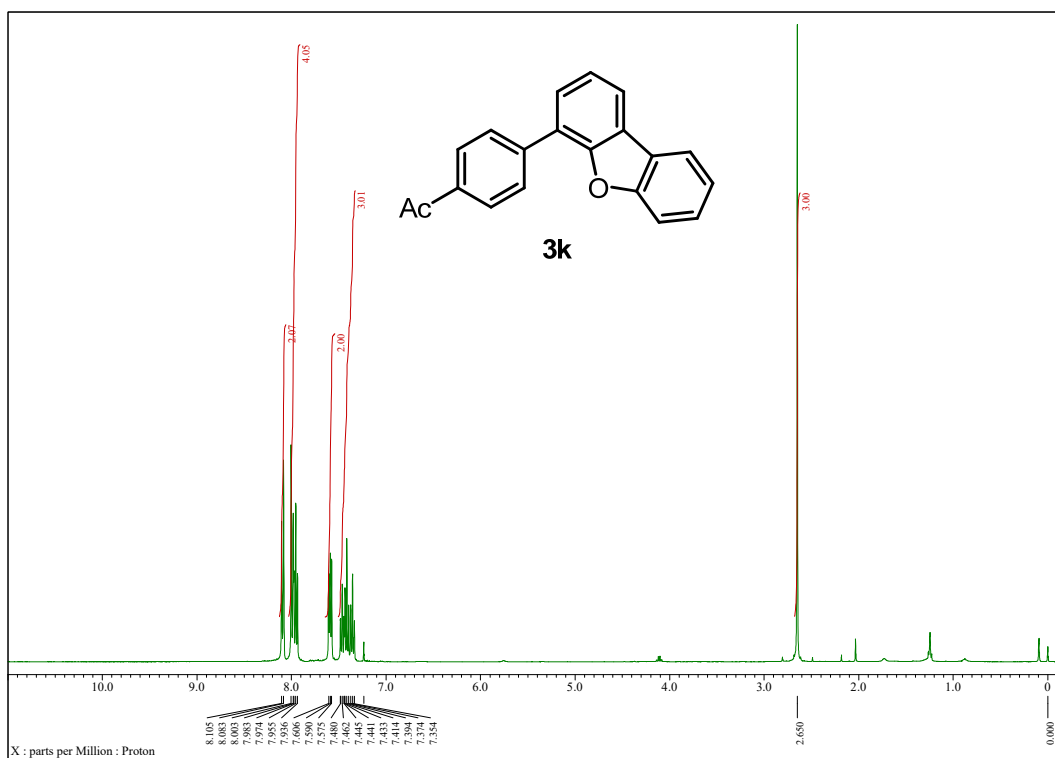

**<sup>13</sup>C NMR of 1-[4-(4-dibenzofuranyl)phenyl]ethanone (3k)**

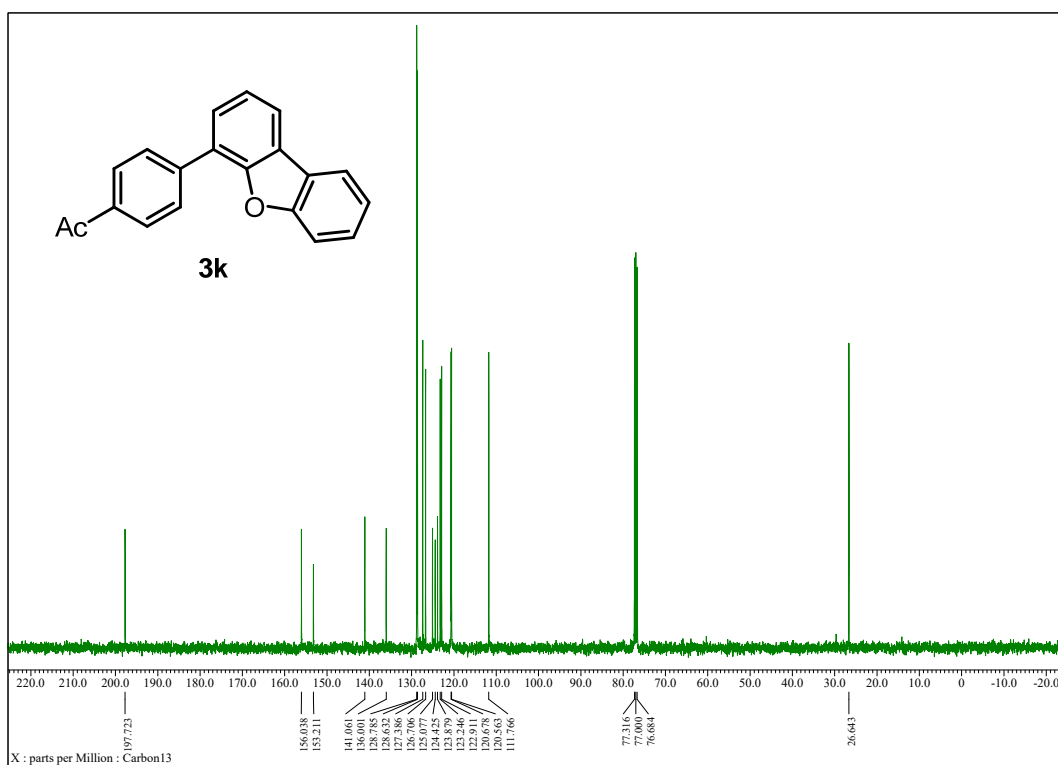

## 8. References

- 1) Tomohiro, I.; Moeko Netsu, Masahiro Mizuno, Tomoteru Mizusaki, Yukio Takagi, Yoshinari Sawama, Yasunari Monguchi, Hironao Sajiki, *Adv. Synth. Catal.* **2017**, 359, 2269–2279.
- 2) Visannagari Ramakrishna, Morla Jhansi Rani, Nareddula Dastagiri Reddy, *Eur. J. Org. Chem.* **2017**, 7238–7255.
